1 The RASSF6 tumor suppressor protein regulates apoptosis and the cell cycle *via*  
2 Retinoblastoma protein.

3

4 Shakhawoat Hossain<sup>1, 2</sup>, Hiroaki Iwasa<sup>1</sup>, Aradhan Sarkar<sup>1</sup>, Junichi Maruyama<sup>1</sup>, Kyoko  
5 Arimoto-Matsuzaki<sup>1</sup>, and Yutaka Hata<sup>1,3,\*</sup>

6

7 <sup>1</sup>Department of Medical Biochemistry, Graduate School of Medical and Dental Sciences,  
8 Tokyo Medical and Dental University, Tokyo 113-8519, Japan

9 <sup>2</sup>Department of Biochemistry and Molecular Biology, University of Rajshahi, Rajshahi-  
10 6205, Bangladesh.

11 <sup>3</sup>Center for Brain Integration Research, Tokyo Medical and Dental University, Tokyo,  
12 113-8519, Japan.

13

14 \*To whom correspondence should be addressed.

15 E-mail: [yuhammch@tmd.ac.jp](mailto:yuhammch@tmd.ac.jp)

16 Phone: 81-3-5803-5164

17 Fax: 81-3-5803-0121

18 Department of Medical Biochemistry, Graduate School of Medical and Dental Sciences,  
19 Tokyo Medical and Dental University, 1-5-45 Yushima, Bunkyo-ku, Tokyo 113-8519,  
20 Japan

21

22

23

24

25

26

27

28

29

30

31

32

33

34

35

36 **ABSTRACT**

37 RASSF6 is a member of the tumor suppressor Ras-association domain family (RASSF)  
38 proteins. *RASSF6* is frequently suppressed in human cancers and its low expression is  
39 associated with poor prognosis. RASSF6 regulates cell cycle arrest and apoptosis and  
40 plays a tumor suppressor role. Mechanistically, RASSF6 blocks MDM2-mediated p53  
41 degradation and enhances p53 expression. However, RASSF6 also induces cell cycle  
42 arrest and apoptosis in the p53-negative background, which implies that the tumor  
43 suppressor function of RASSF6 does not depend solely on p53. In this study, we have  
44 revealed that RASSF6 mediates cell cycle arrest and apoptosis *via* pRb. RASSF6  
45 enhances the interaction between pRb and protein phosphatase. RASSF6 also enhances  
46 *P16INK4A* and *P14ARF* expression through suppressing BMI1. In this way, RASSF6  
47 increases unphosphorylated pRb and augments the interaction between pRb and E2F1.  
48 Moreover, RASSF6 induces TP73-target genes *via* pRb and E2F1 in the p53-negative  
49 background. Finally, we confirmed that RASSF6 depletion induces polyploid cells in p53-  
50 negative HCT116 cells. In conclusion, RASSF6 behaves as a tumor suppressor in cancers  
51 with the loss-of-function of p53, and pRb is implicated in this function of RASSF6.

52

53 **KEY WORDS**

54 Apoptosis, BMI1, Cell cycle arrest, RASSF, Rb1, Tumor suppressor.

55

56 **INTRODCUTION**

57 Ras association domain family (RASSF) 6 is a member of the RASSF proteins (1-3).  
58 *RASSF6* is epigenetically silenced in acute lymphocytic leukemia, chronic lymphocytic  
59 leukemia, neuroblastoma, metastatic melanoma, and gastric cardia adenocarcinoma (4-  
60 8). RASSF6 suppression is more frequently observed in gastric cancer, pancreatic ductal  
61 adenocarcinoma, and gastric cardia adenocarcinoma at the advanced stage (8-10). These  
62 findings support the tumor suppressive role of RASSF6.

63 Exogenously expressed RASSF6 induces apoptosis in caspase-dependent and  
64 caspase-independent manners in various cells (11). Conversely RASSF6 depletion blocks  
65 tumor necrosis factor  $\alpha$ -induced apoptosis in HeLa cells, okadaic acid-induced apoptosis  
66 in rat hepatocytes, and sorbitol-induced apoptosis in human renal proximal tubular  
67 epithelial cells (11-13). RASSF6 also causes G1/S arrest and is implicated in ultraviolet  
68 (UV)-induced cell cycle arrest (14).

69 The Hippo pathway is a tumor-suppressive signaling pathway that comprises  
70 mammalian Ste20-like (MST) 1/2 kinases and large tumor suppressor (LATS) 1/2

71 kinases (15-17). RASSF6 interacts with MST1/2 kinases and inhibits the kinase activity  
72 (12). Reciprocally MST1/2 suppress RASSF6-induced apoptosis. When cells are exposed  
73 to okadaic acid, which activates the Hippo pathway, RASSF6 and MST1/2 are dissociated.  
74 Consequently, RASSF6 induces apoptosis. In this manner RASSF6 co-operates with the  
75 Hippo pathway to function as a tumor suppressor.

76 RASSF6 binds to MDM2 and blocks p53 degradation by MDM2 (14). UV  
77 enhances p53 expression and triggers the transcription of p53 target genes that are  
78 implicated in apoptosis and cell cycle regulation. RASSF6 depletion attenuates UV-  
79 triggered increase of p53 expression and blocks the induction of p53 target genes. MDM2-  
80 p53 is instrumental for the tumor suppressive role of RASSF6. Nevertheless, RASSF6  
81 induces apoptosis even in p53-compromized HeLa cells and p53-negative HCT116  
82 (HCT116 p53<sup>-/-</sup>) cells, suggesting that RASSF6 controls apoptosis *via* a certain molecule  
83 other than p53. Modulator of apoptosis-1 (MOAP1), the activator of Bax, binds to  
84 RASSF6 (12, 18, 19). MOAP1 depletion attenuates RASSF6-induced apoptosis. The  
85 double knockdown of MOAP1 and p53, however, does not exhibit additional effect on  
86 RASSF6-induced apoptosis (14). It means that MOAP1 is placed in the same pathway as  
87 p53.

88 Retinoblastoma protein (pRb) and p53 are thought to be the two major tumor  
89 suppressors (20-23). *RB1* that encodes pRb is mutated in familial retinoblastoma.  
90 Unphosphorylated pRb forms a complex with E2F1 and inhibits E2F1-mediated  
91 transcription (24, 25). The phosphorylation of pRb by cyclin dependent kinases (CDKs)  
92 releases E2F1 from pRb and promotes cell cycle. In this study, we examined the  
93 implication of pRb in the tumor suppressive role of RASSF6. We have demonstrated that  
94 RASSF6 reduces the phosphorylation of pRb to enhance the interaction of pRb and E2F1.  
95 Furthermore, in the presence of RASSF6, E2F1 mediates transcription of pro-apoptotic  
96 *TP73* and *CASP7* in HCT116 p53<sup>-/-</sup> cells. Consistently, the suppression of *RB1* and *E2F1*  
97 decreases RASSF6-mediated apoptosis.

98

## 99 RESULTS

### 100 Depletion of *RB1* overrides RASSF6-induced cell cycle arrest.

101 We tested the effect of RASSF6 on the cell cycle in the p53-negative background.  
102 Exogenously expressed RASSF6 blocked EdU incorporation in HCT116-p53<sup>-/-</sup> cells (**Fig.**  
103 **1A, siCont., arrowheads**). However, when *RB1* was knocked down (**Fig. 1C**), EdU was  
104 incorporated in RASSF6-expressing cells (**Fig. 1A, siRB1#1 and siRB1#2, arrows**). In the  
105 quantification, almost 80% cells incorporated EdU in control cells, whether *RB1* was

106 knocked down or not (**Fig. 1B, black bars**). RASSF6 reduced the incorporation of EdU to  
107 10% (**Fig. 1B, siCont., a gray bar**) but *RBI* silencing recovered it to about 40% (**Fig. 1B,**  
108 **siRB1#1 and siRB1#2, gray bars**).

109

110 **RASSF6 blocks the phosphorylation of pRb and enhances the interaction between pRb**  
111 **and E2F1.**

112 The interaction between pRb and E2F1 is regulated by the phosphorylation of pRb by  
113 CDKs (20, 26, 27). Phosphorylation at threonine-821 induces the intramolecular binding  
114 of the C-terminal domain to the pocket domain and blocks the interaction between pRb  
115 and E2F1 (24, 27). Phosphorylation at serine-608 also inhibits the interaction between  
116 pRb and E2F1 (28). RASSF6 remarkably reduced the phosphorylation at serine-608 and  
117 slightly attenuated the phosphorylation at threonine-821 (**Fig. 2A**). Conversely *RASSF6*  
118 silencing augmented the phosphorylation at these sites (**Fig. 2B**). Serine-807/811 are  
119 phosphorylated by CDK4 and are discussed to be required for phosphorylation at other  
120 sites (24, 29-31). Serine-807 phosphorylation is also considered to play a role in the  
121 G0/G1 transition and the binding to Bax (32, 33). RASSF6 decreased the phosphorylation  
122 at serine-807/811, while *RASSF6* silencing augmented it (**Fig. 2A and 2B**). To further  
123 confirm the effect of RASSF6, we examined the phosphorylation states of pRb in the  
124 cytoplasmic and nuclear fractions. The cytoplasmic pRb was not detected by the antibody  
125 specific for the unphosphorylated pRb, which does not recognize the phosphorylated pRb  
126 (**Fig. 2C, the third panel**). To more clearly separate phosphorylated and  
127 unphosphorylated pRb, we used Phos-tag gels, in which phosphorylated proteins migrate  
128 slowly. The analysis by Phos-tag gels revealed that the major part of the cytoplasmic pRb  
129 was phosphorylated, while most of the nuclear pRb was unphosphorylated but  
130 phosphorylated pRb was also detected in the nucleus (**Fig. 2C, an arrow, the third lane**).  
131 However, the co-expression of RASSF6 reduced the nuclear phosphorylated pRb (**Fig. 2C,**  
132 **an arrowhead, the sixth lane**). All these findings indicate that RASSF6 reduces the  
133 phosphorylation of pRb. In the co-immunoprecipitation experiment using HEK293FT  
134 cells, RASSF6 augmented the interaction between E2F1 and pRb, which is consistent  
135 with the decreased phosphorylation at serine-608 and threonine-821 (**Fig. 2D, an arrow**).  
136 Furthermore, RASSF6 suppressed E2F1-promoter reporter (**Fig. 2E, siCont.**), but *RBI*  
137 silencing abrogated this inhibition, supporting that RASSF6 inhibits E2F1 *via* pRb (**Fig.**  
138 **2E, siRB1#1**). Consistently, *RASSF6* silencing enhanced E2F1-promoter reporter (**Fig,**  
139 **2F**). It is reported that LATS2 is implicated in the assembly of DREAM, which represses  
140 E2F1 target gene transcription (34). Considering that RASSF6 cross-talks with the

141 Hippo pathway, we silenced *LATS1* and *LATS2*. However, RASSF6 suppressed the E2F1  
142 promoter reporter even in the *LATS1/2*-negative background (**Fig. 2G**). Moreover, the  
143 depletion of LIN52, which is a component of DREAM complex (29), did not affect  
144 RASSF6-mediated suppression of E2F1 promoter reporter (**Fig. 2H**). These findings  
145 suggest that RASSF6 functions independently of DREAM complex.

146

#### 147 **RASSF6 promotes the interaction between pRb and protein phosphatases**

148 pRb phosphorylation is regulated by protein phosphatases (PP1A and PP2A) (35). In  
149 *Drosophila melanogaster*, dRASSF, a fly homologue of RASSF, interacts with fly  
150 homologues of components of the striatin-interacting protein phosphatases and kinases  
151 (STRIPAK) complexes (36). STRIPAK is a complex of PP2A that interacts with Ste20-  
152 like kinases (37). In mammals, although the direct interaction between RASSF and  
153 STRIPAK complex is not reported, RASSF proteins are detected in the interactome of  
154 MST kinases and STRIPAK complex (38). We hypothesized that RASSF6 promotes as a  
155 scaffold the interaction between pRb and protein phosphatases and facilitates  
156 dephosphorylation of pRb. We immunoprecipitated RASSF6 from human colon cancer  
157 SW480 cells and detected the co-immunoprecipitated pRb with RASSF6 (**Fig. 3A, an**  
158 **arrow**). To further confirm the interaction, we exogenously expressed RASSF6 and pRb  
159 in HEK293FT cells and performed the co-immunoprecipitation experiment. When  
160 FLAG-RASSF6 was immunoprecipitated, V5-pRb was co-immunoprecipitated (**Fig. 3B,**  
161 **the left**). In the reverse experiment, FLAG-RASSF6 was co-immunoprecipitated with V5-  
162 pRb (**Fig. 3B, the right**). In the experiment shown in Fig 2C, we noted that RASSF6,  
163 when co-expressed with pRb, was recovered not only in the cytoplasm but also in the  
164 nucleus (**Fig. 2C, the second panel**). This observation prompted us to ask whether pRb  
165 affects the subcellular localization of RASSF6. We expressed FLAG-RASSF6 with or  
166 without V5-pRb in HeLa cells and evaluated the subcellular localization in the  
167 immunofluorescence and in the subcellular fractionation (**Fig. 3C and 3D**). FLAG-  
168 RASSF6 was distributed mainly in the cytoplasm (**Fig. 3C, the upper panel, and Fig. 3D**).  
169 However, when co-expressed with V5-pRb, FLAG-RASSF6 was detected in the nucleus  
170 (**Fig. 3C, the lower panel**). The subcellular fractionation also supported that pRb  
171 increased the nuclear RASSF6 (**Fig. 3D, an arrow**). We next examined the effect of  
172 RASSF6 on the interaction between protein phosphatases and pRb. We expressed  
173 luciferase-fused PP1A and PP2A with V5-pRb in HEK293FT cells and  
174 immunoprecipitated V5-pRb. The luciferase activity in the immunoprecipitates was  
175 measured to evaluate the co-immunoprecipitation of PP1A and PP2A with pRb. RASSF6  
176 increased luciferase-PP1A and -PP2A co-immunoprecipitated with pRb (**Fig. 3D**). These  
177 findings are consistent with the assumption that RASSF6 promotes the interaction of

178 pRb with protein phosphatases allowing pRb to remain unphosphorylated. RASSF5  
179 promotes dephosphorylation of pRb (39). RASSF1A blocks dephosphorylation of  
180 mammalian Ste20-like kinases (MST1 and -2) (40). As RASSF1A and RASSF5 can  
181 interact with RASSF6 (41), it is possible that RASSF6 regulates the phosphorylation  
182 state of pRb and the interaction of pRb with E2F1 through RASSF1A and RASSF5.  
183 However, neither *RASSF1* silencing nor *RASSF5* silencing had no effect on the RASSF6-  
184 mediated suppression on E2F1 promoter reporter, which means that RASSF6 regulates  
185 pRb independently of RASSF1A and RASSF5 (**Suppl. Fig. 1**). As pRb and MDM2 interact  
186 with each other (42), we examined whether and how pRb affects the interaction between  
187 RASSF6 and MDM2. However, pRb did not show any effect (**Suppl. Fig. 2**).

188

### 189 **RASSF6 induces *CDKN2A* independently of p53.**

190 Another explanation of the reduced phosphorylation of pRb is the inhibition of CDKs. As  
191 RASSF6 enhances p53 expression, it is reasoned that RASSF6 up-regulates *CDKN1A*  
192 (cyclin-dependent kinase inhibitor 1A) mRNA *via* p53, and inhibits the CDK2/4-  
193 mediated phosphorylation of pRb *via* CDKN1A. However, in this study, we want to know  
194 how RASSF6 functions as a tumor suppressor in the p53-negative background. We  
195 therefore examined whether RASSF6 regulates *CDKN1A* and *CDKN2A* in HCT116 p53-  
196 *-/-* cells. The treatment with doxorubicin enhance *P16INK4A* and *P14ARF*, both of which  
197 are encoded in *CDKN2A* locus, at the mRNA level (**Fig. 4A, siCont.**). RASSF6 depletion  
198 abolished the enhancement of *P16INK4A* and *P14ARF* (**Fig. 4A, siRASSF6#1**).  
199 Doxorubicin, although to a lesser extent, enhanced *CDKN1A* in HCT116 p53<sup>-/-</sup> cells, but  
200 *RASSF6* silencing had no effect on the enhancement of *CDKN1A* (**Fig. 4A, CDKN1A**). It  
201 implies that RASSF6 up-regulates *P16INK4A* and *P14ARF* in the p53-negative  
202 background, inhibits CDK4 *via* p16 protein, and eventually prevents the  
203 phosphorylation of pRb. Moreover, it also suggests that *CDKN1A* is regulated  
204 independently of RASSF6 in the p53-negative background.

205

### 206 **RASSF6 antagonizes BMI1.**

207 The next question is the mechanism by which RASSF6 enhances *P16INK4A* and  
208 *P14ARF*. As polycomb complex protein BMI1 is well-known to down-regulate *P16INK4A*  
209 and *P14ARF* expression, we suspected the implication of BMI1 (43). We examined  
210 whether *BMI1* silencing antagonized *RASSF6* silencing. As expected, the additional  
211 knockdown of *BMI1* recovered the enhancement of *P16INK4A* and *P14ARF* in RASSF6-  
212 depleted cells (**Fig. 4A, siRASSF6#1+siBMI1**). This observation supports that RASSF6  
213 antagonizes BMI1 in the regulation of *P16INK4A* and *P14ARF*. RASSF6 expression did

214 not affect *BMI1* mRNA expression (**data not shown**). We next tested whether and how  
215 RASSF6 affects BMI1 at the protein level. First, we tested the interaction between  
216 RASSF6 and BMI1. BMI1 was co-immunoprecipitated with RASSF6 from SW480 cells  
217 (Figure 4B, an arrow). We could also detect the interaction between exogenously  
218 expressed RASSF6 and BMI1 (**Fig. 4C, the right and the left**). We next examined the  
219 effect of RASSF6 on the stability of BMI1. We first confirmed that the cycloheximide  
220 treatment induced the mobility shift of BMI1 as previously reported (**Fig. 4D, the first  
221 and second lanes**) (44). *RASSF6* silencing increased the upward shifted band (**Fig. 4D,  
222 the third lane, an arrow**). The treatment with  $\lambda$  phosphatase abolished this shift (**Fig.  
223 4D, the fourth lane**). These findings support that cycloheximide induces the  
224 phosphorylation of BMI1 and that *RASSF6* silencing increases it. We next evaluated  
225 BMI1 degradation in the presence of RASSF6 (**Fig. 4E**). GFP-RASSF6 slightly reduced  
226 BMI1 protein expression (**Fig. 4E, 0 h**). More remarkably, RASSF6 decreased the  
227 upward-shifted BMI1 (**Fig. 4E, 3 h to 12 h**).  $\beta$ TrCP regulates BMI1 ubiquitination and  
228 degradation (44). We next examined the effect of *RASSF6* silencing on BMI1 stability in  
229 the presence of  $\beta$ TrCP. *RASSF6* silencing increased the up-ward shifted BMI1 and  
230 delayed its degradation (**Fig. 4F, the right**). Moreover, *RASSF6* silencing reduced BMI1  
231 polyubiquitination (**Fig. 4G**). We also examined the subcellular distribution of RASSF6  
232 and BMI1 (**Suppl. Fig. 3**). RASSF6 did not affect the subcellular localization, but reduced  
233 BMI1 expression. BMI1 did not affect the subcellular localization of RASSF6, either. All  
234 these findings support that RASSF6 promotes the degradation of BMI1, which may  
235 contribute the enhancement of *P16INK4A* and *P14ARF*.

236

### 237 **pRb is involved in RASSF6-induced apoptosis.**

238 In certain circumstances, pRb is involved in apoptosis (45). For instance, in prostate  
239 cancer cells, cell detachment increases unphosphorylated pRb and induces apoptosis (46).  
240 Moreover, under DNA damage, pRb is dephosphorylated at CDK-mediated  
241 phosphorylation sites but phosphorylated by checkpoint kinases (47). Phosphorylated  
242 pRb binds to E2F1 and enhances pro-apoptotic genes (47). We first raised a question  
243 whether pRb is involved in RASSF6-induced apoptosis. We expressed GFP-RASSF6 in  
244 HCT116 p53<sup>-/-</sup> cells. GFP-RASSF6 caused nuclear condensation and induced  
245 cytochrome-C release (**Fig. 5A, siCont., GFP-RASSF6, arrows**). *RBI* silencing decreased  
246 nuclear condensation and cytochrome-C release (**Fig. 5A, siRB1#1 and siRB1#2, GFP-  
247 RASSF6, arrowheads**). In DNA content analysis by flow cytometry, GFP-RASSF6  
248 increased sub-G1 population (**Fig. 5B, siCont., GFP and GFP-RASSF6**). *RBI* silencing,

249 however, reduced sub-G1 population in RASSF6-expressing cells (**Fig. 5B, siCont and**  
250 **siRB1#1, GFP-RASSF6**). These findings support that pRb is involved in RASSF6-  
251 induced apoptosis in the p53-negative background.

252

### 253 **E2F1 is involved in RASSF6-induced apoptosis**

254 E2F1 regulates a wide variety of genes involved in not only proliferation but also  
255 apoptosis (48). For instance, E2F1 regulates apoptosis-related genes such as *APAF1* and  
256 *CASP*s (49, 50). pRb recruits histone deacetylases to repress classic E2F1 target genes  
257 such as *CCNA2*, but in cells exposed to DNA damage, pRb forms a transcriptionally  
258 active complex including E2F1 and P/CAF to promote transcription of pro-apoptotic  
259 genes such as *TP73* and *CASP7* (47, 51, 52). To determine whether E2F1 is involved in  
260 RASSF6-induced apoptosis, we examined the effect of *E2F1* silencing. *E2F1* silencing  
261 attenuated RASSF6-induced nuclear condensation and cytochrome-C release in  
262 RASSF6-expressing HCT116 p53<sup>-/-</sup> cells (**Fig. 6A**). To more directly confirm that  
263 RASSF6 plays a role in pRb/E2F1-mediated transcription of pro-apoptotic genes, we  
264 quantified mRNAs of *TP73*, *CASP7*, and *BAX*. RASSF6 increased pro-apoptotic *TP73*,  
265 *CASP7*, and *BAX*, but had no effect on *CCNA2*. (**Fig. 6B, siCont, gray and black bars**).  
266 However, *RB1* silencing and *E2F1* silencing abolished the effect of RASSF6 (**Fig. 6B,**  
267 **siRB1#1 and siE2F1**). These findings support that E2F1 is involved in RASSF6-induced  
268 apoptosis. Although YAP1, a target of the Hippo pathway, co-operates with p73, *YAP1*  
269 silencing had no effect on RASSF6-mediated apoptosis in HCT116 p53<sup>-/-</sup> cells (**Suppl.**  
270 **Fig. 4**). *BMI1* silencing did not augment RASSF6-induced apoptosis, either (**Suppl. Fig. 5**).  
271

### 272 **RASSF6 depletion impairs DNA repair and causes genomic instability**

273 In the previous study, we demonstrated that RASSF6 depletion impairs DNA repair in  
274 HCT116 cells and results in the generation of polyploid cells (14). To evaluate the  
275 significance of RASSF6 as a tumor suppressor in the p53-negative background, we  
276 examined the effect of RASSF6 depletion on DNA repair in HCT116 p53<sup>-/-</sup> cells. After 3  
277 h-treatment with VP-16,  $\gamma$ H2A.X signals appeared (**Fig. 7A, HCT116 p53<sup>+/+</sup>, 0 h**) but  
278 disappeared within 3 h after the removal of VP-16 in HCT116 p53<sup>+/+</sup> cells (**Fig. 7A,**  
279 **HCT116 p53<sup>+/+</sup>, 3 h**). However, in HCT116 p53<sup>-/-</sup> cells, the signals remained up to 9 h  
280 (**Fig. 7A, HCT116 p53<sup>-/-</sup>, siCont, 9 h**). This means that DNA repair is delayed in HCT116  
281 p53<sup>-/-</sup> cells. Even so,  $\gamma$ H2A.X signals decreased in the time-dependent manner and  
282 became barely detectable 21 h later (**Fig. 7A, HCT116 p53<sup>-/-</sup>, siCont, 21 h**). However,  
283 when RASSF6 was suppressed,  $\gamma$ H2A.X signals were still visible at 21 h (**Fig. 7A,**



284 **HCT116 p53<sup>-/-</sup>, siRASSF6#1, 21 h**). These findings support that RASSF6 is necessary  
285 for DNA repair in the p53-negative background. We cultured VP-16-treated HCT116  
286 p53<sup>-/-</sup> cells for 96 h and analyzed DNA content by FACS. The polyploid cells were  
287 increased by the treatment with VP-16 (**Fig. 7B, siCont, 1.64 % vs 13.03 %**). RASSF6  
288 depletion further increased the polyploid cells (**Fig. 7B, VP-16, siRASSF6#1 and**  
289 **siRASSF6#2**). All these findings support the possibility that RASSF6 plays a tumor  
290 suppressor role in cancer cells with dysregulated p53

291

## 292 **DISCUSSION**

293 RASSF6 is one of the classical RASSF proteins, the proteins that have the Ras-  
294 association domains in the C-terminal region, and co-operates with the well-conserved  
295 tumor suppressor Hippo pathway (41). The low expression of RASSF6 is observed in  
296 human cancers and correlates with the shortened disease-free survival, which  
297 corroborates that RASSF6 plays a tumor suppressive role in human. Forced expression  
298 of RASSF6 induces apoptosis and cell cycle arrest in various cells (11, 12). p53 depletion  
299 attenuates RASSF6-induced apoptosis and overcomes RASSF6-induced cell cycle arrest,  
300 which supports that p53 functions down-stream of RASSF6 (14). In fact, RASSF6  
301 interacts with MDM2 and blocks MDM2-mediated degradation of p53. RASSF6  
302 depletion suppresses ultraviolet exposure-induced p53 target gene expression. KRAS  
303 strengthens the interaction between RASSF6 and MDM2, and causes apoptosis  
304 depending on p53 (19). In this respect, MDM2-p53 is important for the tumor suppressor  
305 role of RASSF6. However, p53 depletion does not completely abolish RASSF6-mediated  
306 apoptosis (14). Moreover, RASSF6 induces apoptosis in p53-negative HCT116 cells.  
307 These findings imply that RASSF6 causes apoptosis independently of p53. This  
308 observation is important, because it means that RASSF6 works as a tumor suppressor  
309 in cancers with p53 mutations. In this line, we have studied the molecular mechanism  
310 underlying the p53-independent tumor suppressor role of RASSF6.

311 *RBI* is the first identified tumor suppressor gene and its defects cause many  
312 human cancers (23). A recent report has revealed that Nore1A (a splicing variant of  
313 RASSF5) forms a complex composed of protein phosphatase 1A and pRb to promote pRb  
314 dephosphorylation and to mediate Ras-induced senescence (39). Based on these data, we  
315 examined the relations of RASSF6 and pRb. To accentuate the role of pRb, we used  
316 HCT116 p53<sup>-/-</sup> cells in this study. First, we confirmed that *RBI* silencing attenuates  
317 RASSF6-induced cell cycle arrest (**Fig. 1**).

318 Unphosphorylated pRb binds and inhibits the E2F family transcription factors

319 (20, 26). When pRb is phosphorylated by CDKs, it fails to bind the E2F proteins, so that  
320 cells proceed from G1 to enter S. During M to G1, pRb is dephosphorylated by protein  
321 phosphatases and returns to the unphosphorylated form (35). As RASSF6 blocks the  
322 DNA synthesis depending on pRb (**Fig. 1**) and Nore1A promotes pRb dephosphorylation  
323 (39), we suspected that RASSF6 as well suppresses the phosphorylation of pRb. As  
324 expected, RASSF6 reduces the phosphorylation at serine-608 and at threonine-821, both  
325 of which destabilize the interaction between pRb and E2F (**Fig. 2**). Accordingly, RASSF6  
326 strengthens the binding of pRb to E2F1 and suppresses E2F1 promoter reporter  
327 depending on pRb (**Fig. 2D and 2E**). Conversely, *RASSF6* silencing enhanced E2F1  
328 promoter reporter (**Fig. 2F**). A kinase shRNA screening revealed that LATS2 promotes  
329 the assembly of DREAM repressor complex and suppresses E2F target genes (34). As  
330 RASSF6 cross-talks with the Hippo pathway, it is reasonable to question whether LATS2  
331 is implicated in RASSF6-mediated suppression of E2F1 reporter activity. However,  
332 *LATS1/2* silencing had no effect (**Fig. 2G**). Moreover, *LIN52* silencing did not affect  
333 RASSF6-mediated repression, either (**Fig. 2H**). These findings suggest that RASSF6  
334 repress E2F1-mediated transcription independently of DREAM repressor complex.  
335 Likewise, *YAP1* silencing did not show any effect on RASSF6-mediated apoptosis (**Suppl.**  
336 **Fig. 4**). This result is comprehensible, because RASSF6 plays a tumor suppressor role  
337 independently of the Hippo pathway (12).

338 As reported for Nore1A, RASSF6 increases the interaction between pRb and  
339 protein phosphatases. RASSF6 and pRb were co-immunoprecipitated (**Fig. 3A and 3B**).  
340 pRb recruited RASSF6 into the nucleus (**Fig. 3C and 3D**). These findings support that  
341 RASSF6 and pRb interact with each other. Considering that proteomic analysis revealed  
342 RASSF proteins in the interactome of MST kinases and STRIPAK complex, we  
343 speculated that RASSF6 may link protein phosphatases to pRb. Indeed, RASSF6  
344 promoted the binding of PP1A and PP2A to pRb (**Fig. 3E**). RASSF6 interacts with other  
345 RASSF proteins (41). RASSF5 promotes dephosphorylation of pRb *via* PP1A (39).  
346 RASSF1A conversely blocks PP1- and PP2A-mediated dephosphorylation of mammalian  
347 Ste20-like kinase 1 and -2 (40). Therefore, it is possible that RASSF6 modulates  
348 phosphorylation of pRb *via* RASSF1A and RASSF5. However, *RASSF1* silencing or  
349 *RASSF5* silencing did not affect the inhibitory effect of RASSF6 on E1F1 promoter  
350 reporter, which indicates that RASSF6 regulates pRb independently of RASSF1 or  
351 RASSF5 (**Suppl. Fig 1**).

352 We also found that RASSF6 increases *P16INK4A* and *P14ARF* expression in  
353 the p53-negative background. RASSF6 promotes the degradation of BMI1, which

354 suppresses *P16INK4A* and *P14ARF*. Serine 110 phosphorylation is known to stabilize  
355 BMI1 (53). It is considered that RASSF6 promotes dephosphorylation of BMI1 and  
356 destabilizes it. We also observed that *CDKN1A* expression was enhanced by doxorubicin  
357 in HCT116 p53<sup>-/-</sup> cells, which is consistent with a previous report (54) but that *RASSF6*  
358 silencing had no effect on *CDKN1A*. In that paper, the researchers demonstrated the  
359 implication of p63. Thus, the induction of *CDKN1A* by doxorubicin in HCT116 p53<sup>-/-</sup>  
360 cells may be independent of RASSF6. In short, RASSF6 reduces the phosphorylation of  
361 pRb in two ways: through the promotion of dephosphorylation and the inhibition of  
362 phosphorylation by CDKs (**Fig 8**).

363 In cells exposed to DNA damage such as doxorubicin treatment, phosphorylated  
364 pRb forms a complex with E2F1 (47). DNA damage triggers the binding of histone  
365 acetyltransferase to E2F1 and the acetylation of E2F1 and promotes the association of  
366 E2F1 with the promoters of proapoptotic genes. Therefore, we examined whether pRb  
367 and E2F1 are implicated in RASSF6-induced apoptosis. The silencing of *RB1* or *E2F1*  
368 suppresses RASSF6-induced apoptosis (**Fig. 5 and Fig. 6**). RASSF6 expression enhances  
369 proapoptotic genes including *TP73*, *CASP7*, and *BAX*, while the silencing of *RB1* or *E2F1*  
370 blocks the effect of RASSF6 (**Fig. 6**). We previously observed that *TP73* silencing did not  
371 attenuate RASSF6-induced apoptosis in HCT116 p53<sup>+/+</sup> cells (14). Therefore, the  
372 enhancement of *TP73* by RASSF6 was unexpected. However, it is discussed that p73  
373 functionally replaces p53 in p53-deficient cells (55). As we used HCT116 p53<sup>-/-</sup> cells in  
374 this study, we speculate that the transcriptional regulatory networks may be changed by  
375 p53 depletion in these cells.

376 In the final set of the experiments, we showed that RASSF6 depletion impairs  
377 DNA repair in the p53-negative cells (**Fig. 7**). RASSF6 depletion also increases the  
378 generation of polyploid cells. These findings suggest that RASSF6 is a significant tumor  
379 suppressor in p53-compromized cells. Of note, *RB1* silencing does not completely abolish  
380 RASSF6-induced apoptosis in p53-negative cells (**Fig. 5**). RASSF6 induces apoptosis and  
381 suppresses proliferation in Saos-2 cells, which have *TP53* mutation and *RB1* mutation  
382 (**data not shown**). These findings mean that there should be a certain mechanism by  
383 which RASSF6 works as a tumor suppressor independently of both p53 and pRb. The  
384 dissection of such a mechanism will also be the subject of the next project.

385

## 386 MATERIALS AND METHODS

387 **DNA constructions and virus production.** pCIneoGFP, pCIneoFH, pCIneoMyc,  
388 pCIneoFHF-RASSF6, pCIneoMyc-RASSF6, pCIneoGFP-RASSF6, pCIneoLuc-PP1A,

389 pCIneoLuc-PP2A, pLenti-EF-ires-blast, and pCIneoHAHA-MDM2 are described  
390 previously (11, 12, 14, 56). pLX304-pRb-V5 was derived from CCSB-Broad Lentiviral  
391 Expression Library (GE Healthcare Dharmacon Inc.). NheI/SalI fragment from  
392 pCIneoFHF-RASSF6 was ligated into SpeI/XhoI sites of pLenti-EF-ires-blast to generate  
393 pLenti-EF-FHF-RASSF6-ires-blast. pcDNA E2F1 is a gift of Masa-Aki Ikeda (Tokyo  
394 Medical and Dental University). PCR was performed with primers (H3086, 5'-  
395 gaattcatggccttgccggggcc-3' and H3087, 5'-gatatcagaaatccaggggggtgag-3') on pcDNA  
396 E2F1 and the product was digested with EcoRI/EcoRV and ligated into EcoRI/SmaI sites  
397 of pCIneoFH to generate pCIneoFH-E2F1. pCGN-HA-Ubc is a gift of Akira Kikuchi  
398 (Osaka University). Human BMI1 cDNA was obtained by PCR using the primers (H-  
399 2539, 5'-acgcgtatgcatcgaacaacgagaat-3' and H-2540, 5'-gtcgcactcaaccagaagaagttgctg-3')  
400 and human lung and kidney cDNA libraries as the template. The PCR product was  
401 cloned into MluI/SalI sites of pCIneoGFP to generate pCIneoGFP-BMI1. pcDNA3-myc3-  
402  $\beta$ TrCP was a gift of Yue Xiong (Addgene plasmid #20718) (57).

403 **Antibodies and reagents.** The antibodies and the reagents were obtained from  
404 commercial sources: rabbit anti-GFP (598) and rat anti-HA (561) (Medical and Biological  
405 Laboratories Co. Ltd., Nagoya, Japan); mouse anti- $\beta$ -actin (A1978); pepstatin A (P5318),  
406 and Hoechst 33342 (Sigma-Aldrich, St. Louis, Dallas, USA); anti-DYKDDDDK-tag (014-  
407 22383), anti-DYKDDDDK-tag beads (016-22784), anti-V5-tag-beads (016-24381), and  
408 leupeptin (334-40414) (Wako Pure Chemical Industries, Osaka, Japan); MG-132  
409 (Nakalai tesque, Tokyo, Japan); lambda phosphatase (sc-200312) (Santa Cruz  
410 Biotechnology, Dallas, TX, USA); rabbit polyclonal anti-V5-tag (PM003) (Medical &  
411 Biological Laboratories Co. Ltd., Nagoya, Japan); rabbit anti-RASSF6 (11921-1-AP)  
412 (Proteintech, Rosemond, Illinois, USA); protein G sepharose 4 fast flow (GE Healthcare,  
413 Little Chalfont, United Kingdom); mouse anti-cytochrome C (6H2 B4) (556432) and  
414 mouse anti-human Rb (554136), and mouse anti-underphosphorylated-Rb (554164) (BD  
415 Biosciences, San Jose, California, USA); mouse anti-Myc (9E10) (American Type Culture  
416 Collection, Manassas, Virginia, USA); rabbit polyclonal anti-phospho-Rb (Ser608) (2181),  
417 rabbit polyclonal anti-phospho-Rb (Ser807/811) (9308) (Cell Signaling Technology,  
418 Danvers, Massachusetts, USA); mouse monoclonal anti-Bmi-1 antibody (05-637) (Merck,  
419 Kenilworth, New Jersey, USA); and rabbit polyclonal anti-phospho-Rb (Thr821) (44-  
420 582G) (Thermo Fisher Scientific, Waltham, Massachusetts, USA).

421 **Cell cultures, transfection, and infection.** HEK293FT, HCT116, HCT116 p53<sup>-/-</sup>,  
422 and HeLa cells were cultured in Dulbecco's Modified Eagle Medium containing 10%(v/v)  
423 fetal bovine serum and 10 mM Hepes-NaOH pH7.4 under 5% CO<sub>2</sub> at 37°C. Transfection

424 was performed with Lipofectamine 2000 (Thermo Fisher Scientific, Waltham, USA).  
425 HEK293FT cells were transfected with pLenti-EF-FHF-RASSF6 and packaging  
426 plasmids to generate the lentivirus vector.

427 **Immunoprecipitation of RASSF6 from SW480 cells.** SW480 cells at 50-60% in  
428 one 100-mm dish were suspended in 1 ml of the phosphate buffer saline (PBS)  
429 supplemented with 50  $\mu$ M p-(amidinophenyl)methanesulfonyl fluoride (APMSF), 10 mg/l  
430 leupeptin, 3 mg/l pepstatin A, and lysed by sonication at high power 3 times for 10 sec  
431 with one-minute interval. The lysates were centrifuged at 20,000 x g for 10 min at 4°C.  
432 The supernatant was incubated with 1  $\mu$ g of rabbit anti-RASSF6 antibody or control  
433 rabbit IgG overnight at 4 °C, and was further incubated with protein G-Sepharose 4 fast-  
434 flow beads (GE Healthcare) for 2 h at 4 °C. The beads were washed four times with PBS.  
435 The precipitates were analyzed by SDS-PAGE and immunoblotting.

436 **Co-immunoprecipitation for exogenously expressed proteins.** HEK293FT cells  
437 were plated at  $1 \times 10^6$  cells/well in a 6 well plate. 24 h later, the indicated plasmids were  
438 transfected with Lipofectamine 2000. 48 h later, the cells were treated with either 10  $\mu$ M  
439 epoxomicin or 10  $\mu$ M MG-132 for 6 h and then harvested. The cells were lysed in 500  $\mu$ l  
440 of the lysis buffer (25 mM Tris-HCl pH7.4, 100 mM NaCl, 1 mM EDTA, 1 mM EGTA,  
441 0.5% (w/v) sodium deoxycholate, 1%(v/v) TritonX-100, 50  $\mu$ M APMSF, 3 mg/l pepstatin A,  
442 10 mg/l leupeptin, 3 mg/l pepstatin A, 50 mM NaF, 2 mM  $\text{Na}_3\text{VO}_4$ , and 10  $\mu$ M MG-132)  
443 and centrifuged at 20,000 x g for 10 min. The supernatant (the input) was incubated with  
444 5  $\mu$ l of anti-DYKDDDDK-tag beads, anti-V5-tag beads or anti-GFP antibody fixed on  
445 protein G-Sepharose 4 fast-flow beads. The beads were washed with the lysis buffer. The  
446 proteins in the inputs and in the immunoprecipitates were detected with antibodies. For  
447 Lumier assay, we used luciferase-fused proteins and measured luciferase activity in  
448 immunoprecipitates by use of Picagene (Toyo INK, Tokyo, Japan) as a substrate (56).

449 **Subcellular fractionation.** Cells at 70-80% confluency in 60-mm dishes were  
450 washed with ice-cold PBS and harvested by scraping. Cells were collected by  
451 centrifugation at 4°C, resuspended with 200  $\mu$ l of the hypotonic buffer (10mM HEPES-  
452 NaOH pH 7.5, 10 mM KCl, 1.5 mM  $\text{MgCl}_2$ , 0.34 M sucrose, 10 % (v/v) glycerol, 0.05 %  
453 (v/v) Nonidet P-40, 50 mM APMSF, 10 mg/l leupeptin, 3 mg/l pepstatin, 50 mM NaF, 2  
454 mM  $\text{Na}_3\text{VO}_4$ , and 25 mM  $\beta$ -glycerophosphate) and kept at 4°C for 5 min. Cells were then  
455 resuspended by pipetting. After 66.6 $\mu$ l of the mixture was saved as the whole cell lysate,  
456 the remaining samples were centrifuged at 800 x g at 4°C for 5 min. The supernatant  
457 was centrifuged again at 20,000 x g for 10 min at 4°C. 90 $\mu$ l of the supernatant was

458 collected as the cytosolic fraction. The pellet was washed twice with the hypotonic buffer,  
459 suspended with 133.3  $\mu$ l of the same buffer and used as the nuclear fraction.

460 **Monitoring active DNA synthesis.** Active DNA synthesis was evaluated by use  
461 of Click-iT Edu Alexa 488 Imaging kit (#C10337) (Thermo Fisher Scientific) according to  
462 the manufacturer's protocol.

463 **Apoptosis.** GFP-RASSF6 proteins were expressed in HCT116 p53<sup>-/-</sup> cells. The  
464 cells were immunostained with anti-cytochrome C antibody and the nuclei were  
465 visualized with Hoechst 33342. The cytochrome C release and the nuclear condensation  
466 were evaluated. Detection of the sub-G1 population was performed by FACS as described  
467 previously (14).

468 **RNA interference.** RNA interferences were performed by use of Lipofectamine  
469 RNAiMAX (Thermo Fisher Scientific). The following small interfering (si) RNAs are  
470 obtained from Thermo Fisher Scientific; Silencer Select negative control no.2; human  
471 RASSF6 #1 (s46640) and #2 (s46639); human E2F1 (s4405); human RB1 #1 (s523) and  
472 #2 (s522); human BMI1 (s2015); human LATS1 (s17392); human LATS2 (s25505);  
473 human RASSF1 (s22088); human RASSF5 (s38021); and human YAP1 #1 (s20366) and  
474 #2 (s20367). Human LIN52 (sc-92126) was obtained from Santa Cruz Biotechnology.

475 **Quantitative RT-PCR.** Quantitative RT-PCR was performed in HCT116 p53<sup>-/-</sup>  
476 cells as described previously (14). Primers are listed in **Table 1**.

477 **Reporter assay.** For the E2F1 reporter assay, HEK293FT cells were transfected  
478 with E2F1-Luc (-242) reporter (a gift of Masa-Aki Ikeda, Tokyo Medical and Dental  
479 University) and pCMV alkaline phosphatase (a gift of Sumiko Watanabe, The University  
480 of Tokyo). Luciferase activity was assayed as described previously (58).

481 **Treatment with lambda phosphatase.** HCT116 p53<sup>-/-</sup> cells were plated at  $4 \times 10^5$   
482 cells in a 60-mm dish and transfected with control siRNA or *RASSF6* siRNA. 72 h later,  
483 the cells were treated with 50 mg/l cycloheximide for 3 h. Then the cells were collected  
484 and lysed in 200  $\mu$ l of the above described lysis buffer. The lysates were centrifuged at  
485 20,000 x g for 10 min. 39.5  $\mu$ l of the supernatant was added by 200 unit (0.5  $\mu$ l) of lambda  
486 protein phosphatase, 10 x lambda phosphatase buffer (500 mM Hepes-NaOH pH 7.5, 1  
487 mM EGTA, 50 mM dithiothreitol and 0.1% Brij 35) and 5  $\mu$ l of 20 mM MnCl<sub>2</sub> and  
488 incubated for 30 mi at 30 °C.

489 **Ubiquitination of BMI1.** HEK293FT cells were transfected with either control  
490 siRNA or *RASSF6*-targeted siRNA. 24 h later, the cells were further transfected with  
491 pCIneoFH-BMI1 and pCGN-HA-UBC. 48 h later, the cells were treated with 30  $\mu$ M MG-  
492 132 for 6 h, harvested, and lysed in the denaturing buffer A (6 M guanidium

493 hydrochloride, 100 mM Na<sub>2</sub>HPO<sub>4</sub>/NaH<sub>2</sub>PO<sub>4</sub> pH8.0, 10 mM Tris-HCl pH8.0, and 10 mM  
494 β-mercaptoethanol) by sonication. FH-BMI1 was isolated by use of Ni-NTA agarose beads  
495 (QIAGEN, Vento, Netherlands). The beads were washed with buffer B (8 M urea, 100  
496 mM Na<sub>2</sub>HPO<sub>4</sub>/NaH<sub>2</sub>PO<sub>4</sub> pH8.0, 10 mM Tris-HCl pH8.0, and 10 mM β-mercaptoethanol),  
497 FH-BMI1 was eluted with buffer C (200 mM Imidazole, 10 mM Tris-HCl pH6.7, 0.72 M  
498 β-mercaptoethanol, 5% (w/v) SDS, and 30% glycerol). The eluents were analyzed by the  
499 immunoblotting with anti-HA and anti-FLAG antibodies.

500 **Statistical Analysis.** Statistical analyses were performed with Student's *t* test  
501 for comparison between two samples and analysis of variance with Bonferroni's post hoc  
502 test for multiple comparisons using GraphPad Prism software (GraphPad Software).

503

#### 504 **ACKNOWLEDGEMENTS**

505 We are grateful for Dr. Masa-Aki Ikeda (Tokyo Medical and Dental University), Dr.  
506 Akira Kikuchi (Osaka University), Dr. Yue Xiong (University of North Carolina) for the  
507 materials. Plasmid collections of lentiviral human cDNA expression library (GE  
508 Dharmacon, UK) were supplied from TMDU Gene Library. S.H. and A.S. are supported  
509 by the MEXT scholarship. This work was supported by research grants from Japan  
510 Society for the Promotion of Science (JSPS) (26460359, 26293061), and the Mitsubishi  
511 Foundation (26138). The authors declare no conflict of interest.

512

513 **REFERENCES**

- 514 1. **Avruch J, Zhou D, Fitamant J, Bardeesy N, Mou F, Barrufet LR.** 2012. Protein  
515 kinases of the Hippo pathway: regulation and substrates. *Semin Cell Dev Biol* **23**:770-  
516 784.
- 517 2. **Volodko N, Gordon M, Salla M, Ghazaleh HA, Baksh S.** 2014. RASSF tumor  
518 suppressor gene family: Biological functions and regulation. *FEBS Lett.*
- 519 3. **Iwasa H, Hossain S, Hata Y.** 2018. Tumor suppressor C-RASSF proteins. *Cell Mol*  
520 *Life Sci.*
- 521 4. **Hesson LB, Dunwell TL, Cooper WN, Catchpoole D, Brini AT, Chiaramonte R,**  
522 **Griffiths M, Chalmers AD, Maher ER, Latif F.** 2009. The novel RASSF6 and  
523 RASSF10 candidate tumour suppressor genes are frequently epigenetically  
524 inactivated in childhood leukaemias. *Mol Cancer* **8**:42.
- 525 5. **Shinawi T, Hill V, Dagklis A, Baliakas P, Stamatopoulos K, Agathangelou A,**  
526 **Stankovic T, Maher ER, Ghia P, Latif F.** 2012. KIBRA gene methylation is associated  
527 with unfavorable biological prognostic parameters in chronic lymphocytic leukemia.  
528 *Epigenetics* **7**:211-215.
- 529 6. **Djos A, Martinsson T, Kogner P, Carén H.** 2012. The RASSF gene family members  
530 RASSF5, RASSF6 and RASSF7 show frequent DNA methylation in neuroblastoma.  
531 *Mol Cancer* **11**:40.
- 532 7. **Mezzanotte JJ, Hill V, Schmidt ML, Shinawi T, Tommasi S, Krex D, Schackert G,**  
533 **Pfeifer GP, Latif F, Clark GJ.** 2014. RASSF6 exhibits promoter hypermethylation in  
534 metastatic melanoma and inhibits invasion in melanoma cells. *Epigenetics* **9**:1496-  
535 1503.
- 536 8. **Guo W, Dong Z, Guo Y, Shen S, Guo X, Kuang G, Yang Z.** 2015. Decreased expression  
537 and frequent promoter hypermethylation of RASSF2 and RASSF6 correlate with  
538 malignant progression and poor prognosis of gastric cardia adenocarcinoma. *Mol*  
539 *Carcinog.*
- 540 9. **Wen Y, Wang Q, Zhou C, Yan D, Qiu G, Yang C, Tang H, Peng Z.** 2011. Decreased  
541 expression of RASSF6 is a novel independent prognostic marker of a worse outcome  
542 in gastric cancer patients after curative surgery. *Ann Surg Oncol* **18**:3858-3867.
- 543 10. **Ye HL, Li DD, Lin Q, Zhou Y, Zhou QB, Zeng B, Fu ZQ, Gao WC, Liu YM, Chen RW,**  
544 **Li ZH, Chen RF.** 2015. Low RASSF6 expression in pancreatic ductal adenocarcinoma  
545 is associated with poor survival. *World J Gastroenterol* **21**:6621-6630.
- 546 11. **Ikeda M, Hirabayashi S, Fujiwara N, Mori H, Kawata A, Iida J, Bao Y, Sato Y, Iida**  
547 **T, Sugimura H, Hata Y.** 2007. Ras-association domain family protein 6 induces  
548 apoptosis via both caspase-dependent and caspase-independent pathways. *Exp Cell*  
549 *Res* **313**:1484-1495.



- 550 12. **Ikeda M, Kawata A, Nishikawa M, Tateishi Y, Yamaguchi M, Nakagawa K,**  
551 **Hirabayashi S, Bao Y, Hidaka S, Hirata Y, Hata Y.** 2009. Hippo pathway-dependent  
552 and -independent roles of RASSF6. *Sci Signal* **2**:ra59.
- 553 13. **Withanage K, Nakagawa K, Ikeda M, Kurihara H, Kudo T, Yang Z, Sakane A, Sasaki**  
554 **T, Hata Y.** 2012. Expression of RASSF6 in kidney and the implication of RASSF6 and  
555 the Hippo pathway in the sorbitol-induced apoptosis in renal proximal tubular  
556 epithelial cells. *J Biochem* **152**:111-119.
- 557 14. **Iwasa H, Kudo T, Maimaiti S, Ikeda M, Maruyama J, Nakagawa K, Hata Y.** 2013.  
558 The RASSF6 tumor suppressor protein regulates apoptosis and the cell cycle via  
559 MDM2 protein and p53 protein. *J Biol Chem* **288**:30320-30329.
- 560 15. **Pan D.** 2010. The hippo signaling pathway in development and cancer. *Dev Cell*  
561 **19**:491-505.
- 562 16. **Kodaka M, Hata Y.** 2014. The mammalian Hippo pathway: regulation and function  
563 of YAP1 and TAZ. *Cell Mol Life Sci.*
- 564 17. **Meng Z, Moroishi T, Guan KL.** 2016. Mechanisms of Hippo pathway regulation.  
565 *Genes Dev* **30**:1-17.
- 566 18. **Allen NP, Donniger H, Vos MD, Eckfeld K, Hesson L, Gordon L, Birrer MJ, Latif F,**  
567 **Clark GJ.** 2007. RASSF6 is a novel member of the RASSF family of tumor  
568 suppressors. *Oncogene* **26**:6203-6211.
- 569 19. **Sarkar A, Iwasa H, Hossain S, Xu X, Sawada T, Shimizu T, Maruyama J, Arimoto-**  
570 **Matsuzaki K, Hata Y.** 2017. Domain analysis of Ras-association domain family  
571 member 6 upon interaction with MDM2. *FEBS Lett* **591**:260-272.
- 572 20. **Weinberg RA.** 1995. The retinoblastoma protein and cell cycle control. *Cell* **81**:323-  
573 330.
- 574 21. **Vogelstein B, Lane D, Levine AJ.** 2000. Surfing the p53 network. *Nature* **408**:307-310.
- 575 22. **Vousden KH, Lane DP.** 2007. p53 in health and disease. *Nat Rev Mol Cell Biol* **8**:275-  
576 283.
- 577 23. **Dyson NJ.** 2016. RB1: a prototype tumor suppressor and an enigma. *Genes Dev*  
578 **30**:1492-1502.
- 579 24. **Rubin SM.** 2013. Deciphering the retinoblastoma protein phosphorylation code.  
580 *Trends Biochem Sci* **38**:12-19.
- 581 25. **Macdonald JI, Dick FA.** 2012. Posttranslational modifications of the retinoblastoma  
582 tumor suppressor protein as determinants of function. *Genes Cancer* **3**:619-633.
- 583 26. **Dick FA, Rubin SM.** 2013. Molecular mechanisms underlying RB protein function.  
584 *Nat Rev Mol Cell Biol* **14**:297-306.
- 585 27. **Rubin SM, Gall AL, Zheng N, Pavletich NP.** 2005. Structure of the Rb C-terminal  
586 domain bound to E2F1-DP1: a mechanism for phosphorylation-induced E2F release.

- 587 Cell **123**:1093-1106.
- 588 28. **Burke JR, Deshong AJ, Pelton JG, Rubin SM.** 2010. Phosphorylation-induced  
589 conformational changes in the retinoblastoma protein inhibit E2F transactivation  
590 domain binding. *J Biol Chem* **285**:16286-16293.
- 591 29. **Zarkowska T, Mittnacht S.** 1997. Differential phosphorylation of the retinoblastoma  
592 protein by G1/S cyclin-dependent kinases. *J Biol Chem* **272**:12738-12746.
- 593 30. **Lundberg AS, Weinberg RA.** 1998. Functional inactivation of the retinoblastoma  
594 protein requires sequential modification by at least two distinct cyclin-cdk complexes.  
595 *Mol Cell Biol* **18**:753-761.
- 596 31. **Ezhevsky SA, Nagahara H, Vocero-Akbani AM, Gius DR, Wei MC, Dowdy SF.** 1997.  
597 Hypo-phosphorylation of the retinoblastoma protein (pRb) by cyclin D:Cdk4/6  
598 complexes results in active pRb. *Proc Natl Acad Sci U S A* **94**:10699-10704.
- 599 32. **Antonucci LA, Egger JV, Krucher NA.** 2014. Phosphorylation of the Retinoblastoma  
600 protein (Rb) on serine-807 is required for association with Bax. *Cell Cycle* **13**:3611-  
601 3617.
- 602 33. **Ren S, Rollins BJ.** 2004. Cyclin C/cdk3 promotes Rb-dependent G0 exit. *Cell* **117**:239-  
603 251.
- 604 34. **Tschöp K, Conery AR, Litovchick L, Decaprio JA, Settleman J, Harlow E, Dyson N.**  
605 2011. A kinase shRNA screen links LATS2 and the pRB tumor suppressor. *Genes Dev*  
606 **25**:814-830.
- 607 35. **Kolupaeva V, Janssens V.** 2013. PP1 and PP2A phosphatases--cooperating partners  
608 in modulating retinoblastoma protein activation. *FEBS J* **280**:627-643.
- 609 36. **Ribeiro PS, Josué F, Wepf A, Wehr MC, Rinner O, Kelly G, Tapon N, Gstaiger M.** 2010.  
610 Combined functional genomic and proteomic approaches identify a PP2A complex as  
611 a negative regulator of Hippo signaling. *Mol Cell* **39**:521-534.
- 612 37. **Shi Z, Jiao S, Zhou Z.** 2016. STRIPAK complexes in cell signaling and cancer.  
613 *Oncogene*.
- 614 38. **Couzens AL, Knight JD, Kean MJ, Teo G, Weiss A, Dunham WH, Lin ZY, Bagshaw  
615 RD, Sicheri F, Pawson T, Wrana JL, Choi H, Gingras AC.** 2013. Protein interaction  
616 network of the Mammalian hippo pathway reveals mechanisms of kinase-  
617 phosphatase interactions. *Sci Signal* **6**:rs15.
- 618 39. **Barnoud T, Donninger H, Clark GJ.** 2016. Ras Regulates Rb via NORE1A. *J Biol  
619 Chem* **291**:3114-3123.
- 620 40. **Guo C, Zhang X, Pfeifer GP.** 2011. The tumor suppressor RASSF1A prevents  
621 dephosphorylation of the mammalian STE20-like kinases MST1 and MST2. *J Biol  
622 Chem* **286**:6253-6261.
- 623 41. **Iwasa H, Jiang X, Hata Y.** 2015. RASSF6; the Putative Tumor Suppressor of the

- 624 RASSF Family. *Cancers (Basel)* **7**:2415-2426.
- 625 42. **Uchida C, Miwa S, Kitagawa K, Hattori T, Isobe T, Otani S, Oda T, Sugimura H,**  
626 **Kamijo T, Ookawa K, Yasuda H, Kitagawa M.** 2005. Enhanced Mdm2 activity inhibits  
627 pRB function via ubiquitin-dependent degradation. *EMBO J* **24**:160-169.
- 628 43. **Jacobs JJ, Kieboom K, Marino S, DePinho RA, van Lohuizen M.** 1999. The oncogene  
629 and Polycomb-group gene *bmi-1* regulates cell proliferation and senescence through  
630 the *ink4a* locus. *Nature* **397**:164-168.
- 631 44. **Sahasrabudhe AA, Dimri M, Bommi PV, Dimri GP.** 2011.  $\beta$ TrCP regulates BMI1  
632 protein turnover via ubiquitination and degradation. *Cell Cycle* **10**:1322-1330.
- 633 45. **Indovina P, Pentimalli F, Casini N, Vocca I, Giordano A.** 2015. RB1 dual role in  
634 proliferation and apoptosis: cell fate control and implications for cancer therapy.  
635 *Oncotarget* **6**:17873-17890.
- 636 46. **Day ML, Foster RG, Day KC, Zhao X, Humphrey P, Swanson P, Postigo AA, Zhang**  
637 **SH, Dean DC.** 1997. Cell anchorage regulates apoptosis through the retinoblastoma  
638 tumor suppressor/E2F pathway. *J Biol Chem* **272**:8125-8128.
- 639 47. **Ianari A, Natale T, Calo E, Ferretti E, Alesse E, Screpanti I, Haigis K, Gulino A, Lees**  
640 **JA.** 2009. Proapoptotic function of the retinoblastoma tumor suppressor protein.  
641 *Cancer Cell* **15**:184-194.
- 642 48. **Müller H, Bracken AP, Vernell R, Moroni MC, Christians F, Grassilli E, Prosperini E,**  
643 **Vigo E, Oliner JD, Helin K.** 2001. E2Fs regulate the expression of genes involved in  
644 differentiation, development, proliferation, and apoptosis. *Genes Dev* **15**:267-285.
- 645 49. **Moroni MC, Hickman ES, Lazzerini Denchi E, Caprara G, Colli E, Cecconi F, Müller**  
646 **H, Helin K.** 2001. Apaf-1 is a transcriptional target for E2F and p53. *Nat Cell Biol*  
647 **3**:552-558.
- 648 50. **Nahle Z, Polakoff J, Davuluri RV, McCurrach ME, Jacobson MD, Narita M, Zhang**  
649 **MQ, Lazebnik Y, Bar-Sagi D, Lowe SW.** 2002. Direct coupling of the cell cycle and cell  
650 death machinery by E2F. *Nat Cell Biol* **4**:859-864.
- 651 51. **Korah J, Falah N, Lacerte A, Lebrun JJ.** 2012. A transcriptionally active pRb-E2F1-  
652 P/CAF signaling pathway is central to TGF $\beta$ -mediated apoptosis. *Cell Death Dis*  
653 **3**:e407.
- 654 52. **Pediconi N, Ianari A, Costanzo A, Belloni L, Gallo R, Cimino L, Porcellini A,**  
655 **Screpanti I, Balsano C, Alesse E, Gulino A, Levrero M.** 2003. Differential regulation  
656 of E2F1 apoptotic target genes in response to DNA damage. *Nat Cell Biol* **5**:552-558.
- 657 53. **Banerjee Mustafi S, Chakraborty PK, Dwivedi SK, Ding K, Moxley KM, Mukherjee**  
658 **P, Bhattacharya R.** 2017. BMI1, a new target of CK2 $\alpha$ . *Mol Cancer* **16**:56.
- 659 54. **Ma S, Tang J, Feng J, Xu Y, Yu X, Deng Q, Lu Y.** 2008. Induction of p21 by p65 in p53  
660 null cells treated with Doxorubicin. *Biochim Biophys Acta* **1783**:935-940.

- 661 55. **Vayssade M, Haddada H, Faridoni-Laurens L, Tourpin S, Valent A, Bénard J,**  
662 **Ahomadegbe JC.** 2005. P73 functionally replaces p53 in Adriamycin-treated, p53-  
663 deficient breast cancer cells. *Int J Cancer* **116**:860-869.
- 664 56. **Kawano S, Maruyama J, Nagashima S, Inami K, Qiu W, Iwasa H, Nakagawa K,**  
665 **Ishigami-Yuasa M, Kagechika H, Nishina H, Hata Y.** 2015. A cell-based screening for  
666 TAZ activators identifies ethacridine, a widely used antiseptic and abortifacient, as  
667 a compound that promotes dephosphorylation of TAZ and inhibits adipogenesis in  
668 C3H10T1/2 cells. *J Biochem* **158**:413-423.
- 669 57. **Ohta T, Xiong Y.** 2001. Phosphorylation- and Skp1-independent in vitro  
670 ubiquitination of E2F1 by multiple ROC-cullin ligases. *Cancer Res* **61**:1347-1353.
- 671 58. **Bao Y, Nakagawa K, Yang Z, Ikeda M, Withanage K, Ishigami-Yuasa M, Okuno Y,**  
672 **Hata S, Nishina H, Hata Y.** 2011. A cell-based assay to screen stimulators of the  
673 Hippo pathway reveals the inhibitory effect of dobutamine on the YAP-dependent  
674 gene transcription. *J Biochem* **150**:199-208.  
675  
676

677 **LEGENDS to FIGURES**

678

679 **Figure 1. RASSF6 suppresses EdU incorporation via pRb.**

680 (A) HCT116 p53<sup>-/-</sup> cells were transfected with control siRNA or *RBI* siRNAs. 48 h later,  
681 the cells were replated at 5x10<sup>4</sup> cells/well in a 12-well plate and transfected with  
682 pCIneoFHF-RASSF6 (FLAG-RASSF6). 6 h after transfection, the cells were treated  
683 with 2 mM thymidine, cultured for 18 h, and then released from the thymidine block.  
684 2 h later, the cells were treated with 10 μM EdU for 1h and fixed and immunostained  
685 with anti-FLAG<sup>-</sup> (red) and anti-EdU<sup>-</sup> (green) antibodies. The nuclei were visualized  
686 with Hoechst 33342. In the upper panel (siCont.), the arrowheads indicate that  
687 FLAG-RASSF6-expressing cells do not incorporate EdU. In the lower panels  
688 (siRB1#1 and #2), the arrows indicate FLAG-RASSF6-expressing cells that  
689 incorporate EdU. Bar, 10 μm.

690 (B) 150 FLAG-positive cells and negative cells were observed. The ratio of the cells  
691 incorporating EdU was calculated. Three independent samples were evaluated. Data  
692 indicate the mean with S.D. \*\*\*, p<0.001.

693 (C) Validation of *RBI*, *RASSF6*, and *E2F1* silencing in HCT116 p53<sup>-/-</sup> cells. HCT116 p53-  
694 <sup>-/-</sup> cells were transfected with control, two *RBI*, two *RASSF6*, and *E2F1* siRNAs. 96  
695 h later, mRNAs were extracted and quantitative RT-PCR was performed. \*\*\*,  
696 p<0.001; and \*\*\*\*, p<0.0001.

697

698 **Figure 2. RASSF6 suppresses pRb phosphorylation and enhances the interaction**  
699 **between pRb and E2F1.**

700 (A) The cell lysates of parent HCT116 p53<sup>-/-</sup> cells transfected with control pCIneoFHF  
701 (FLAG) or pCIneoFHF-RASSF6 (FLAG-RASSF6) were immunoblotted with the  
702 indicated antibodies to detect endogenous pRb and to evaluate the phosphorylation.

703 (B) HCT116 p53<sup>-/-</sup> cells were transfected with control siRNA (siCont.) or *RASSF6* siRNA  
704 (siRASSF6#1). 72 h later, the cell lysates were immunoblotted with the indicated  
705 antibodies.

706 (C) V5-pRb (pLX304-pRb-V5) was expressed alone or with FLAG-RASSF6 in HCT116  
707 p53<sup>-/-</sup> cells. 24 h later, the cells were harvested and the subcellular fractionation was  
708 performed. The comparable amounts of the whole cell lysates (W), the cytoplasmic  
709 fraction (C) and the nuclear fraction (N) were analyzed by SDS-PAGE for the  
710 immunoblotting with anti-FLAG, anti-V5, anti-unphosphorylated-Rb, anti-FLAG,  
711 anti- Poly (ADP-ribose) polymerase (PARP), and anti-α-tubulin antibodies, or on the

712 Phos-tag gel for the immunoblotting with anti-V5 antibody to evaluate  
713 phosphorylated and unphosphorylated pRb. PARP and  $\alpha$ -tubulin were used as  
714 nuclear and cytoplasmic markers. The arrow indicates the phosphorylated pRb in  
715 the nuclear fraction. As indicated by the arrowhead, RASSF6 reduced the  
716 phosphorylated pRb in the nuclear fraction.

717 (D) HEK293FT cells were transfected with various combinations of pLX304-pRb-V5,  
718 pCIneoFH-E2F1, and pCIneoMyc-RASSF6. Immunoprecipitation was performed  
719 with anti-DYKDDDDK (1E6) antibody beads. The inputs and the  
720 immunoprecipitates were immunoblotted with the indicated antibodies. In the  
721 presence of RASSF6, the amount of the co-immunoprecipitated pRb was increased  
722 (the arrow). The asterisk indicates the immunoglobulin heavy chain.

723 (E) HEK293FT cells were transfected with control siRNA or *RBI* siRNA#1. 48 h later,  
724 the cells were transfected with E2F1-Luc (-242) reporter and pCMV alkaline  
725 phosphatase. E2F1 (pCIneoFH-E2F1) and/or RASSF6 (pCIneoMyc-RASSF6) were  
726 co-expressed. 24 h later, luciferase assay was conducted by use of Picagene as a  
727 substrate. RASSF6 suppressed E2F1-mediated enhancement of luciferase activity  
728 (the second and third bars, siCont), but *RBI* knockdown abolished the effect of  
729 RASSF6. \*\*,  $p < 0.01$ ; n.s., not significant.

730 (F) HEK293FT cells were transfected with control siRNA or *RASSF6* siRNAs (#1 or #2),  
731 The reporter assay was performed as described for Figure 2E. \*\*\*,  $p < 0.001$ .

732 (G) HEK293FT cells were transfected with *LATS1* and *LATS2* siRNAs. The reporter  
733 assay was performed as described for Figure 2E. The validation of *LATS1/2* silencing  
734 was demonstrated on the right. \*\*\*,  $p < 0.001$ .

735 (H) HEK293FT cells were transfected with *LIN52* siRNA. The reporter assay was  
736 performed as described for Figure 2E. The validation of *LIN52* silencing was  
737 demonstrated on the right. \*\*\*,  $p < 0.001$ .

738

739 **Figure 3. RASSF6 mediates the interaction between pRb and protein phosphatases.**

740 (A) RASSF6 was immunoprecipitated from SW480 cells. The inputs and the  
741 immunoprecipitates were immunoblotted with the indicated antibodies. The arrow  
742 indicates the co-immunoprecipitated pRb,

743 (B) HEK293FT cells were transfected with pLX304-pRb-V5 and either control  
744 pCIneoFHF (FLAG) or pCIneoFHF-RASSF6 (FLAG-RASSF6). Immunoprecipitation  
745 was performed with anti-DYKDDDDK (1E6) antibody (the left) or anti-V5 antibody

746 (the right) beads. The inputs and the immunoprecipitates were immunoblotted with  
747 the indicated antibodies. The asterisks indicate the immunoglobulin heavy chain.  
748 (C) and (D) FLAG-RASSF6 (pCIneoFHF-RASSF6) was expressed alone or with V5-pRb  
749 (pLX304-pRb-V5) in HeLa cells. In (C), FLAG-RASSF6 was distributed in the cytoplasm,  
750 when expressed alone, but was detected in the nucleus, when co-expressed with V5-pRb.  
751 Bar, 10  $\mu$ m. In (D), the subcellular fractionation was performed. The nuclear RASSF6  
752 was increased when co-expressed with V5-pRb (the arrow).  
753 (E) HEK293FT cells were transfected with various combinations of pCIneoLuc-PP1A,  
754 pCIneoLuc-PP2A, pLX304-pRb-V5, control pCIneoFHF, and pCIneoFHF-RASSF6.  
755 The immunoprecipitation was performed with anti-V5 antibody beads. In the bottom  
756 panels, the immunoprecipitated V5-pRb was shown. Luciferase activities in the  
757 inputs and immunoprecipitates were measured by use of Picagene as a substrate. \*\*\*,  
758  $p < 0.001$ .  
759

760 **Figure 4. RASSF6 antagonizes BMI1 and is implicated in *P16INK4A* and *P14ARF***  
761 ***expressions in the p53-negative background.***

762 (A) HCT116 p53<sup>-/-</sup> cells were transfected with indicated siRNAs. 24 h later the cells were  
763 exposed to 1 mg/l doxorubicin for 1h, and then washed. The cells were further  
764 cultured and harvested to isolate mRNAs. *CDKN2A* and *P14ARF* were examined  
765 after 5 day-culture, while *CDKN1A* was evaluated after 2 day-culture with  
766 quantitative RT-PCR. *RPS18* was used as a reference. Doxorubicin enhanced  
767 *P16INK4A* and *P14ARF* expressions. Doxorubicin also enhanced *CDKN1A*  
768 expression, but to a lesser extent. *RASSF6* knockdown abolished the effect of  
769 doxorubicin. However, the additional *BMI1* silencing recovered doxorubicin-induced  
770 enhancement of *P16INK4A* and *P14ARF*. \*\*,  $p < 0.01$ ; \*\*\*,  $p < 0.001$ ; and n.s., not  
771 significant. The validation of *BMI1* silencing was performed by qRT-PCR.

772 (B) RASSF6 was immunoprecipitated from SW480 cells. The inputs and the  
773 immunoprecipitates were immunoblotted with the indicated antibodies. The arrow  
774 indicates the co-immunoprecipitated BMI1.

775 (C) HEK293FT cells were transfected with control pCIneoFHF (FLAG), pCIneoFHF-  
776 RASSF6 (FLAG-RASSF6), control pCIneoGFP (GFP), and pCIneoGFP-BMI1 (GFP-  
777 BMI1) as indicated. The immunoprecipitation was performed with either anti-  
778 DYKDDDDK (1E6) antibody beads (the right) or anti-GFP antibody fixed on protein  
779 G sepharose fast flow 4 beads (the left). The asterisk indicates the immunoglobulin  
780 heavy chain.

781 (D) HCT116 p53<sup>-/-</sup> cells were transfected with control siRNA (siCont.) or *RASSF6* siRNA  
782 (siRASSF6#2). 72 h later, the cells were treated with 50 mg/l cycloheximide for 3 h.  
783 The treatment with lambda phosphatase abolished the upper band. The samples  
784 were immunoblotted with the indicated antibodies. Endogenous BMI1 was detected.  
785 (E) HCT116 p53<sup>-/-</sup> cells were transfected with pCIneoGFP-RASSF6. 24 h later, the cells  
786 were treated with 50 mg/l cycloheximide and collected at the indicated time points.  
787 Endogenous BMI1 was immunoblotted. RASSF6 reduced phosphorylated BMI1 and  
788 facilitated BMI degradation.  
789 (F) HCT116 p53<sup>-/-</sup> cells were transfected with control siRNA (siCont.) or *RASSF6* siRNA  
790 (siRASSF6#1). 24 h later, the cells were transfected with pcDNA3-myc3-βTrCP. 48  
791 h later, BMI1 degradation was evaluated as described for Figure 5D. *RASSF6*  
792 silencing increased phosphorylated BMI1 and delayed BMI1 degradation.  
793 (G) HEK293FT cells were transfected with control siRNA or *RASSF6* siRNAs (#1 and  
794 #2). 24 h later, the cells were transfected with pCIneFH-BMI1 and pCGN-HA-UBC.  
795 48 h later, the cells were treated with 30 μM MG-132 for 6 h and then the cells were  
796 lysed with the buffer containing guanidine hydrochloride. FH-BMI1 was isolated  
797 with NiNTA beads and immunoblotted with anti-HA antibody. *RASSF6* silencing  
798 reduced BMI1 ubiquitination.

799

800 **Figure 5. pRb is implicated in RASSF6-induced apoptosis in HCT116 p53<sup>-/-</sup> cells.**

801 HCT116 p53<sup>-/-</sup> cells were transfected with control siRNA or *RBI* siRNAs. 48 h later, the  
802 cells were replated on cover slips and were transfected with control pCIneoGFP (GFP)  
803 or pCIneoGFP-RASSF6 (GFP-RASSF6). In (A), 24 h later, the cells were immunostained  
804 with anti-cytochrome-C antibodies. The nuclei were visualized with Hoechst 33342. 50  
805 GFP-positive cells were observed and the ratios of the cells with nuclear condensation  
806 and cytochrome-C release were calculated. GFP-RASSF6 induced nuclear condensation  
807 (arrows) but *RBI* silencing blocked it (arrowheads). Data indicate the mean with S.D.  
808 \*\*\*, p<0.001. Scale bars, 10 μm. In (B), the cells were fixed in ice-cold 70 %(v/v) ethanol,  
809 washed with PBS, and resuspended in PBS containing 10 mg/l propidium iodide and 1  
810 g/l RNaseA. The sub-G1 population was evaluated with FACS Calibur (BD Biosciences).  
811 The data were analyzed by use of BD CellQuest Pro Software. Data indicate the mean  
812 with S.D. \*, p<0.05; \*\*, p<0.01.

813

814 **Figure 6. E2F1 is implicated in RASSF6-induced apoptosis in HCT116 p53<sup>-/-</sup> cells.**

815 (A) HCT116 p53<sup>-/-</sup> cells were transfected with control siRNA or *E2F1* siRNA. 48 h later,



816 the cells were replated on cover slips and transfected with control pCIneoGFP (GFP)  
817 or pCIneoGFP-RASSF6 (GFP-RASSF6). Apoptosis was evaluated as described for  
818 Figure 5A. Data indicate the mean with S.D. \*\*\*,  $p < 0.001$ . Scale bars, 10  $\mu\text{m}$ .

819 (B) HCT116 p53<sup>-/-</sup> cells were transfected with control siRNA, *RBI* siRNA#1, or *E2F1*  
820 siRNA. 48 h later, the cells were transfected with control pCIneoGFP or pCIneoGFP-  
821 RASSF6. 24 h later, the cells were harvested and mRNAs were collected. qRT-PCR  
822 was performed by use of glyceraldehyde-3-phosphate dehydrogenase as a reference.  
823 The value for the cells expressing control GFP was set at 1.0. Data indicate the mean  
824 with S.D. for the triplicate samples. *TP73*, *CASP7*, and *BAX* genes were up-regulated  
825 by RASSF6. *RBI* or *E2F1* knockdown abolished the effect of RASSF6. *CCNA2* gene  
826 was not enhanced by RASSF6. \*\*\*,  $p < 0.001$ ; and n.s., not significant.

827

828 **Figure 7. RASSF6 depletion delays DNA repair and increases polyploid cells in the p53-**  
829 **negative background.**

830 HCT116 p53<sup>+/+</sup> cells were exposed to 50  $\mu\text{M}$  VP-16 for 3 h and then VP-16 was removed.  
831 The cells were harvested at the indicated time points and  $\gamma\text{H2A.X}$  was immunostained.  
832 The scheme of the protocol was demonstrated on the top in (A). HCT116 p53<sup>-/-</sup> cells were  
833 transfected with control siRNA or *RASSF6* siRNA (#1 in (A); #1 and #2 in (B)). 48 h later,  
834 the cells were exposed to 50  $\mu\text{M}$  VP-16 for 3 h and then VP-16 was removed. In (A),  
835 thereafter,  $\gamma\text{H2A.X}$  was immunostained at the indicated time points (0 h means  
836 “immediately after 3 h-treatment with VP-16”) and  $\gamma\text{H2A.X}$  was immunostained. 500  
837 cells were observed for each sample and  $\gamma\text{H2A.X}$ -positive cells were counted. The bar  
838 graphs are the summary of three independent experiments. Data indicate the mean with  
839 S.D. \*\*\*,  $p < 0.001$ . Scale bars, 20  $\mu\text{m}$ . In (B), the cells were cultured for 96 h after removal  
840 of VP-16, and DNA contents were evaluated by use of FACS. VP-16 treatment induced  
841 polyploid cells, and RASSF6 depletion further increased them.

842

843 **Figure 8. The mechanism by which RASSF6 keeps pRb unphosphorylated.**

844 RASSF6 links protein phosphatases to pRb and promotes dephosphorylation of pRb.  
845 RASSF6 also reduces the phosphorylated form of BMI1, which is resistant against  
846  $\beta\text{TrCP}$ -mediated degradation, eventually destabilizes BMI1, and increases P16INK4A,  
847 which in turn inhibits CDK4.

848

849

850 **Table 1. Primers for qRT-PCR**

|                 |   |                           |
|-----------------|---|---------------------------|
| <i>RB1</i>      | F | GAACATCGAATCATGGAATCCCT   |
|                 | R | AGAGGACCAGCAGATTCAAGGTGAT |
| <i>E2F1</i>     | F | ATGTTTTCTGTGCCCTGAG       |
|                 | R | ATCTGTGGTGAGGGATGAGG      |
| <i>RASSF6</i>   | F | ACGTCTTCTCCAGCAAAGGA      |
|                 | R | CAGAGCTGCTTCACTCATGG      |
| <i>CDKN1A</i>   | F | GGCAGACCAGCATGACAGATT     |
|                 | R | GCGGATTAGGGCTTCCTCTT      |
| <i>P16INK4A</i> | F | AACGCACCGAATAGTTACGGT     |
|                 | R | CTGCCCATCATCATGACCT       |
| <i>P14ARF</i>   | F | AGGGTTTTCTGTGGTTCACAT     |
|                 | R | CTGCCCATCATCATGACCT       |
| <i>TP73</i>     | F | CCCACCACTTTGAGGTCCT       |
|                 | R | GGCGATCTGGCAGTAGAGTT      |
| <i>CASP7</i>    | F | GCAGTGGGATTTGTGCTTCT      |
|                 | R | CCCTAAAGTGGGCTGTCAAA      |
| <i>BAX</i>      | F | ATGTTTTTCTGACGGCAACTTC    |
|                 | R | ATCAGTTCCGGCAACCTTG       |
| <i>CCNA2</i>    | F | TCCATGTCAGTGCTGAGAGGA     |
|                 | R | GAAGGTCCATGAGACAAGGC      |
| <i>GAPDH</i>    | F | CCACTCCTCCACCTTTGAC       |
|                 | R | ACCCTGTTGCTGTAGCCA        |
| <i>BMI1</i>     | F | GGCTCTAATGAAGATAGAGGAG    |
|                 | R | TCACAGTCATTGCTGCTGGGCA    |
| <i>RPS18</i>    | F | TTTGCGAGTACTCAACACCAA     |
|                 | R | GCATATCTTCGGCCACA         |
| <i>RASSF1A</i>  | F | GACTCTGGGGAGGTGAACTG      |
|                 | R | GGAGTACTTCTGCAGGATCTGG    |
| <i>RASSF5</i>   | F | GACAGCTACAACACGCGAGA      |
|                 | R | AGGGGCAGGTAGAAGGATGT      |
| <i>LATS1</i>    | F | GTCCTTCGTGTGGGCTACAT      |
|                 | R | CGAGGATCTTCGGTTGACAT      |

*LATS2* F TTCATCCACCGAGACATCAA  
R CTCCATGCTGTCCTGTCTGA  
*YAP1* F CAGCACAGCAAATTCTCCAA  
R TGGATTTTGAGTCCCACCAT  
*LIN52* F CGAGGCCTACAGAACCTAGC  
R ATTTCCCCCGTGTCATCTC

851

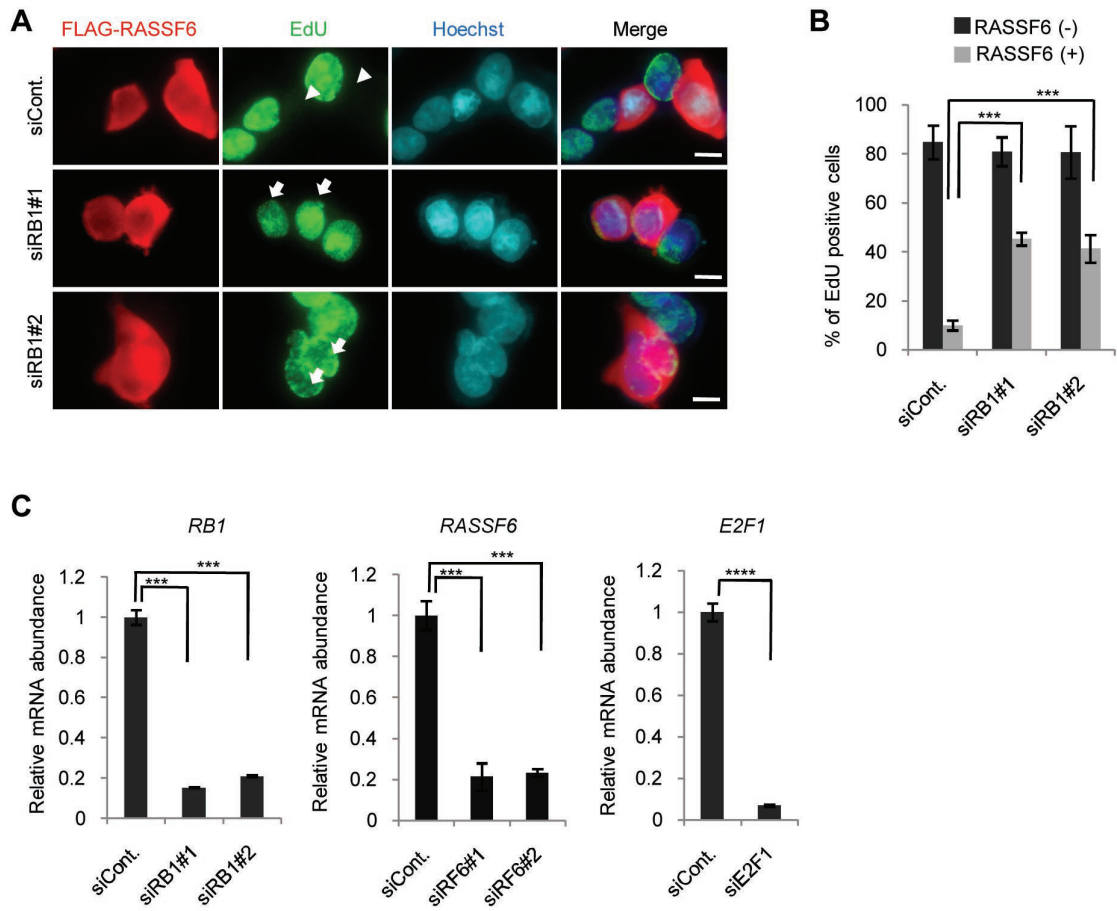

Figure 1: Hossain *et. al.*

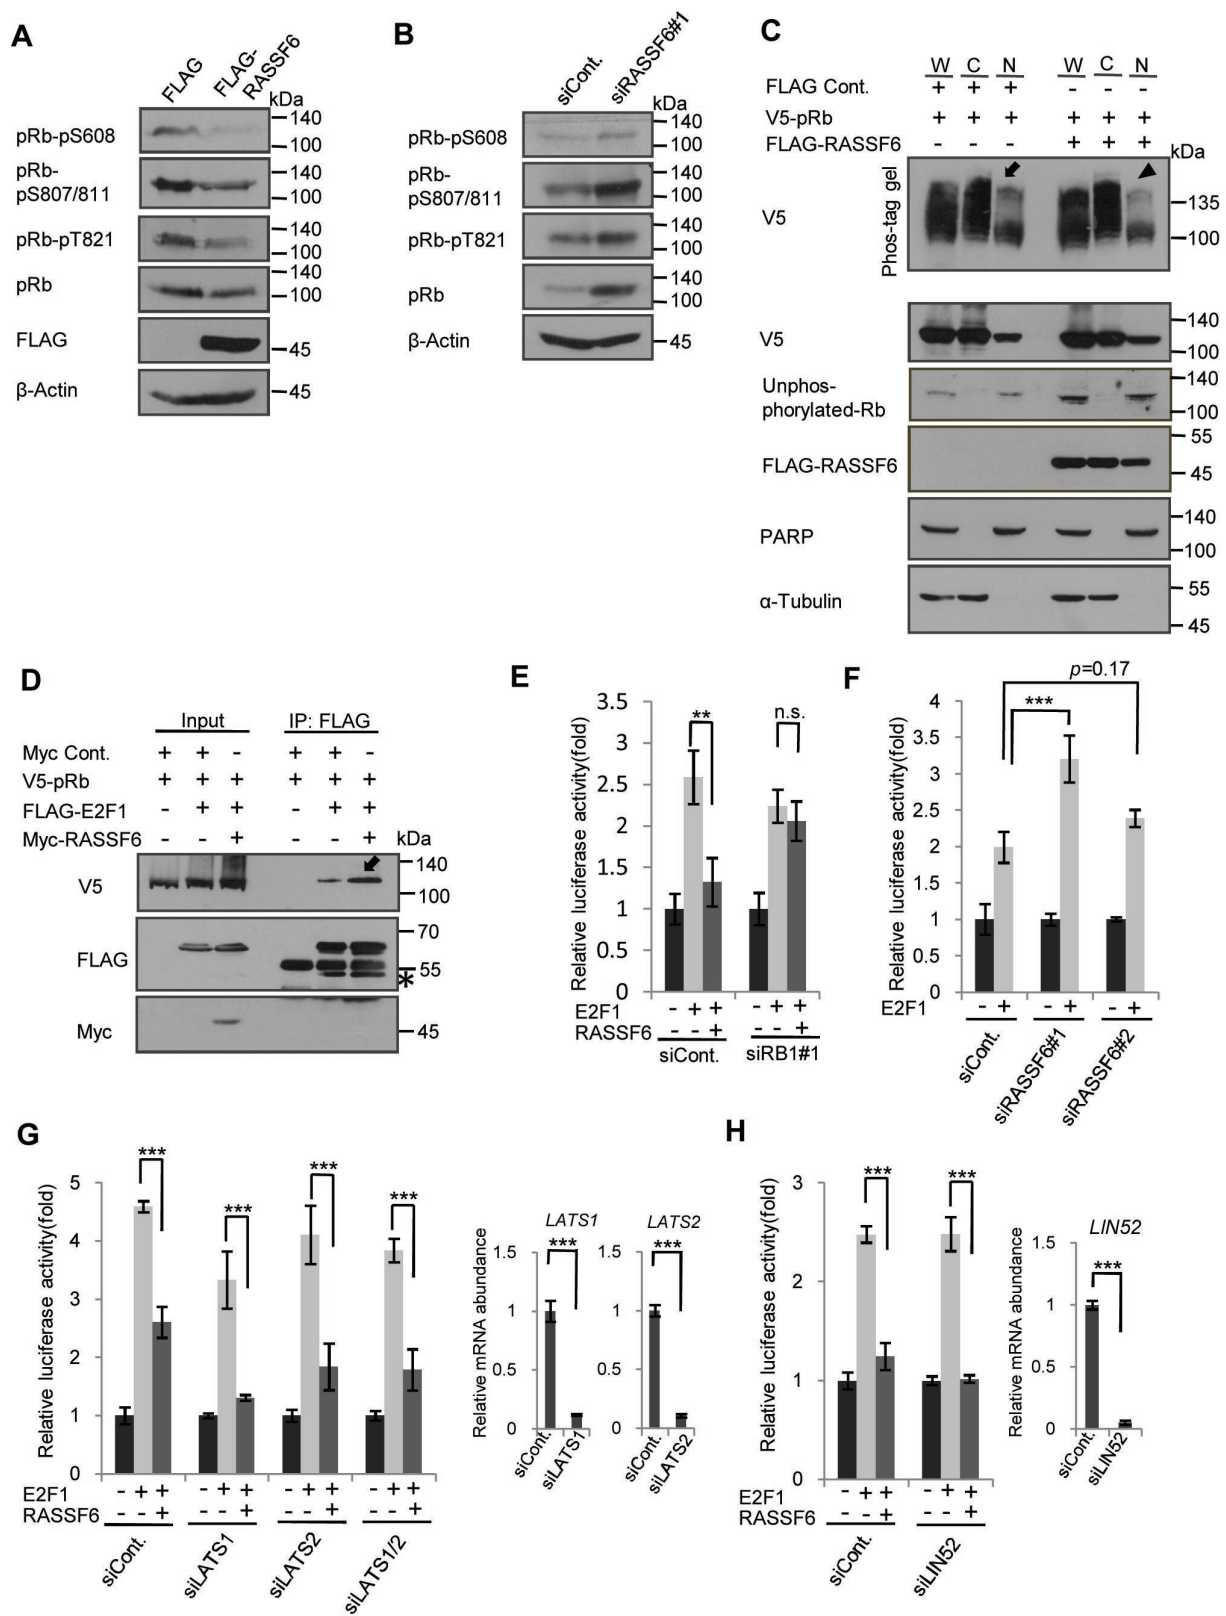

Figure 2: Hossain *et. al.*

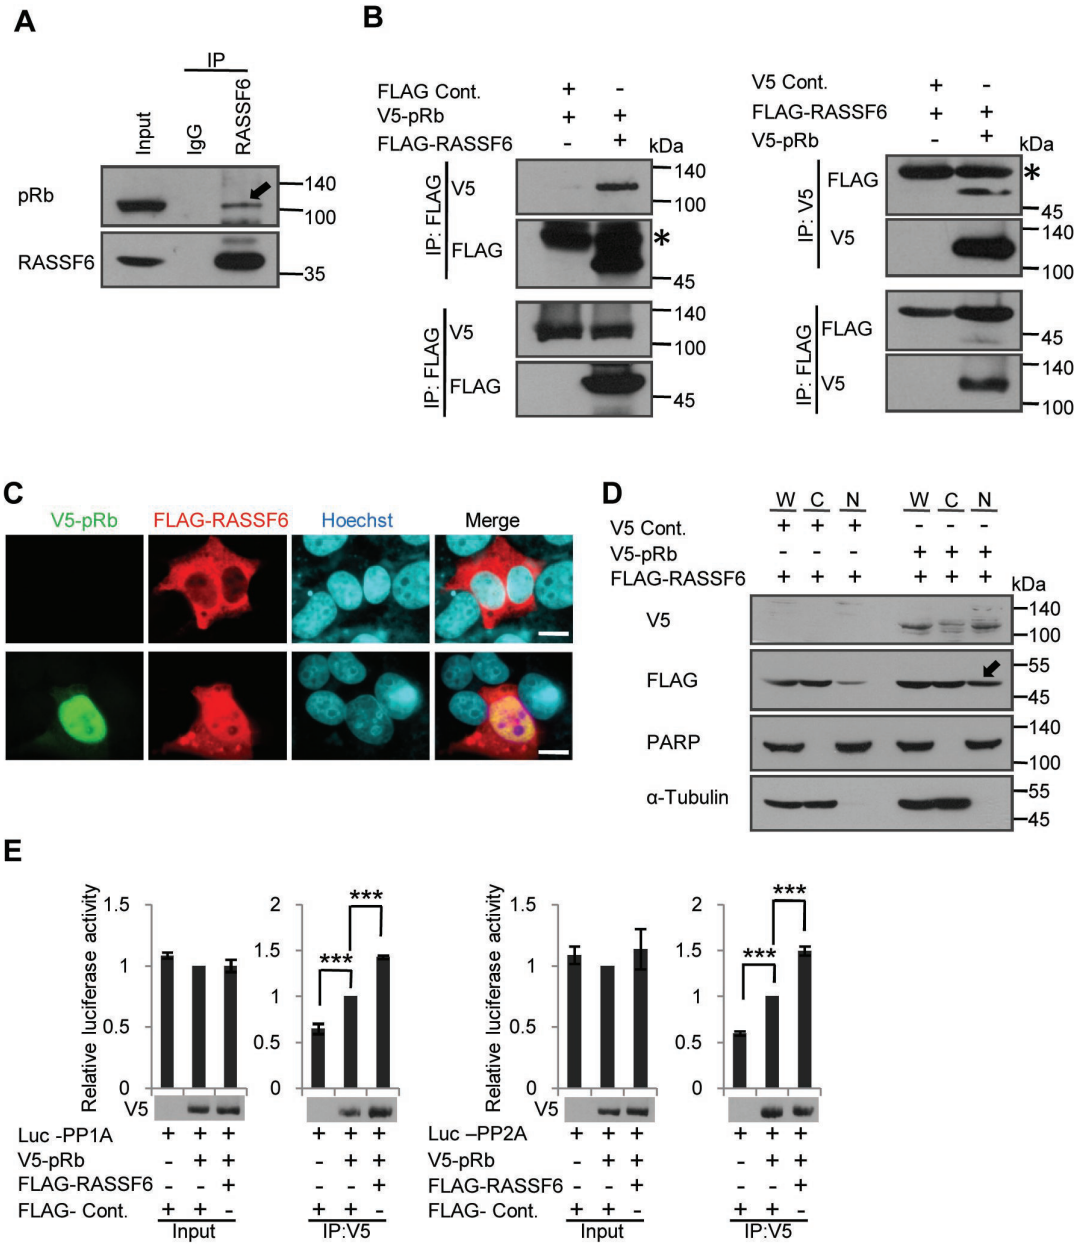

Figure 3: Hossain *et al.*

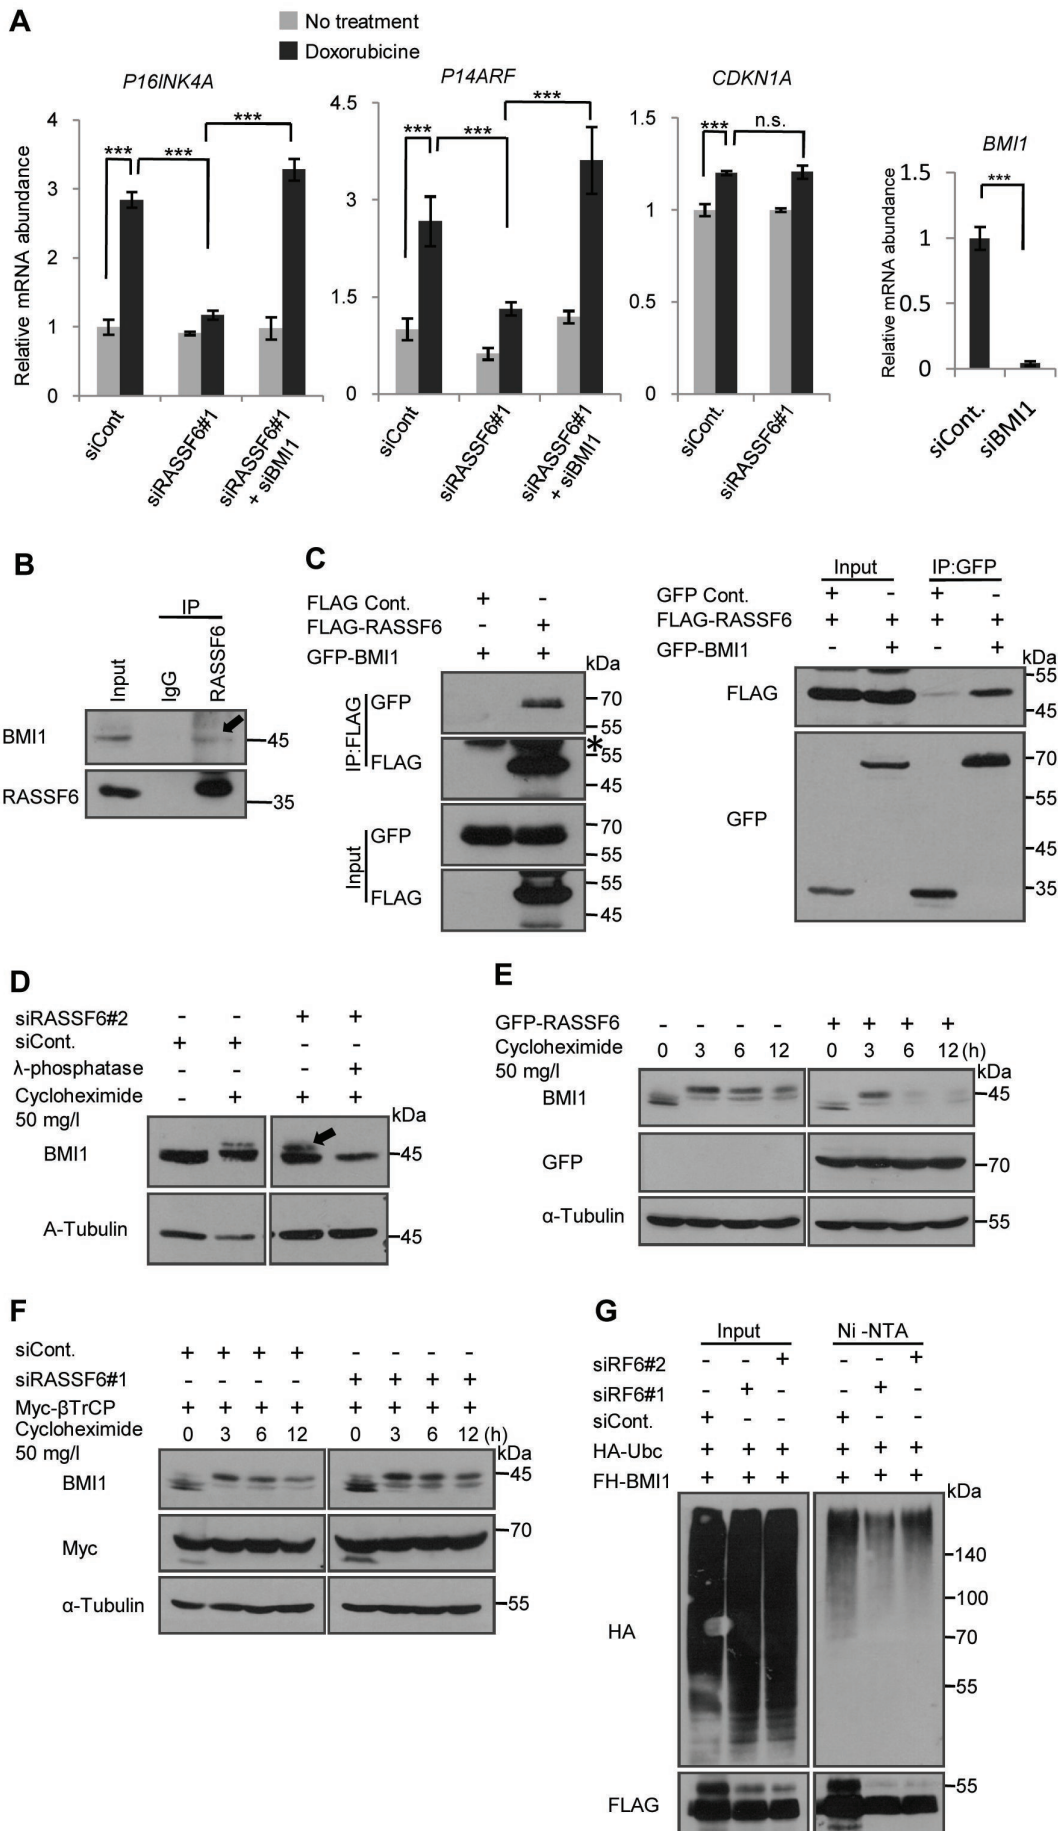

Figure 4: Hossain et al.

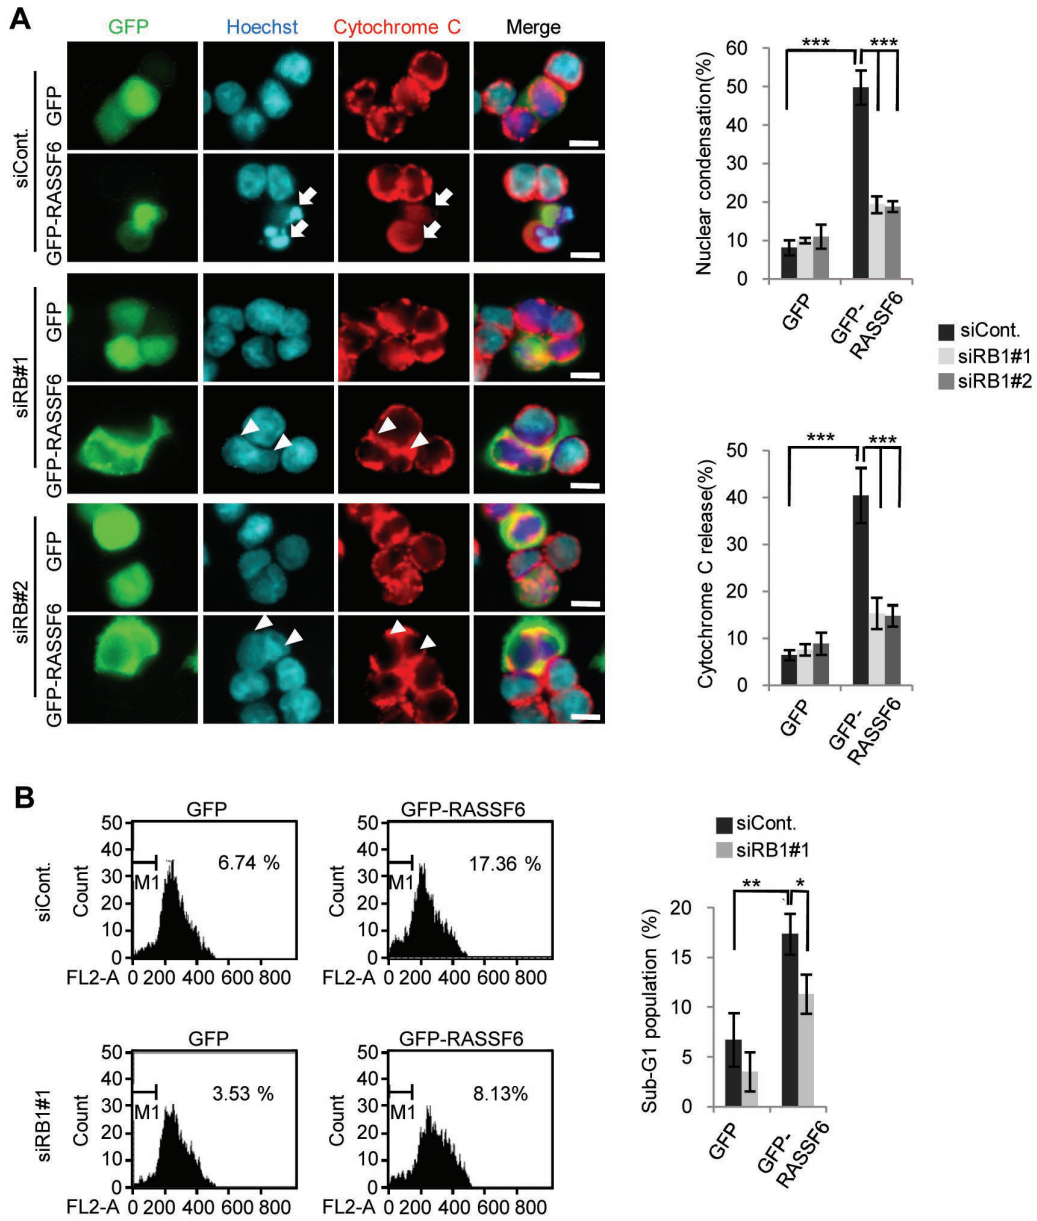

Figure 5: Hossain *et. al.*



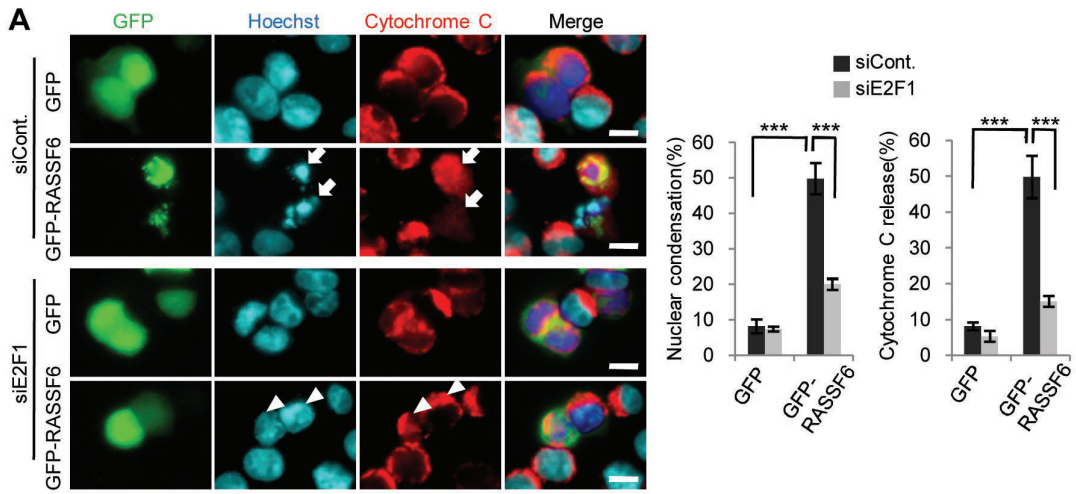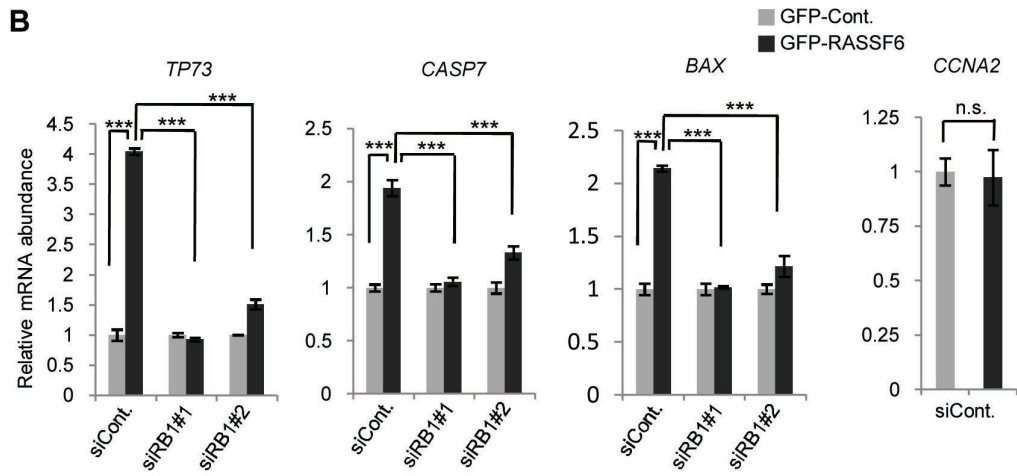

Figure 6: Hossain *et. al.*

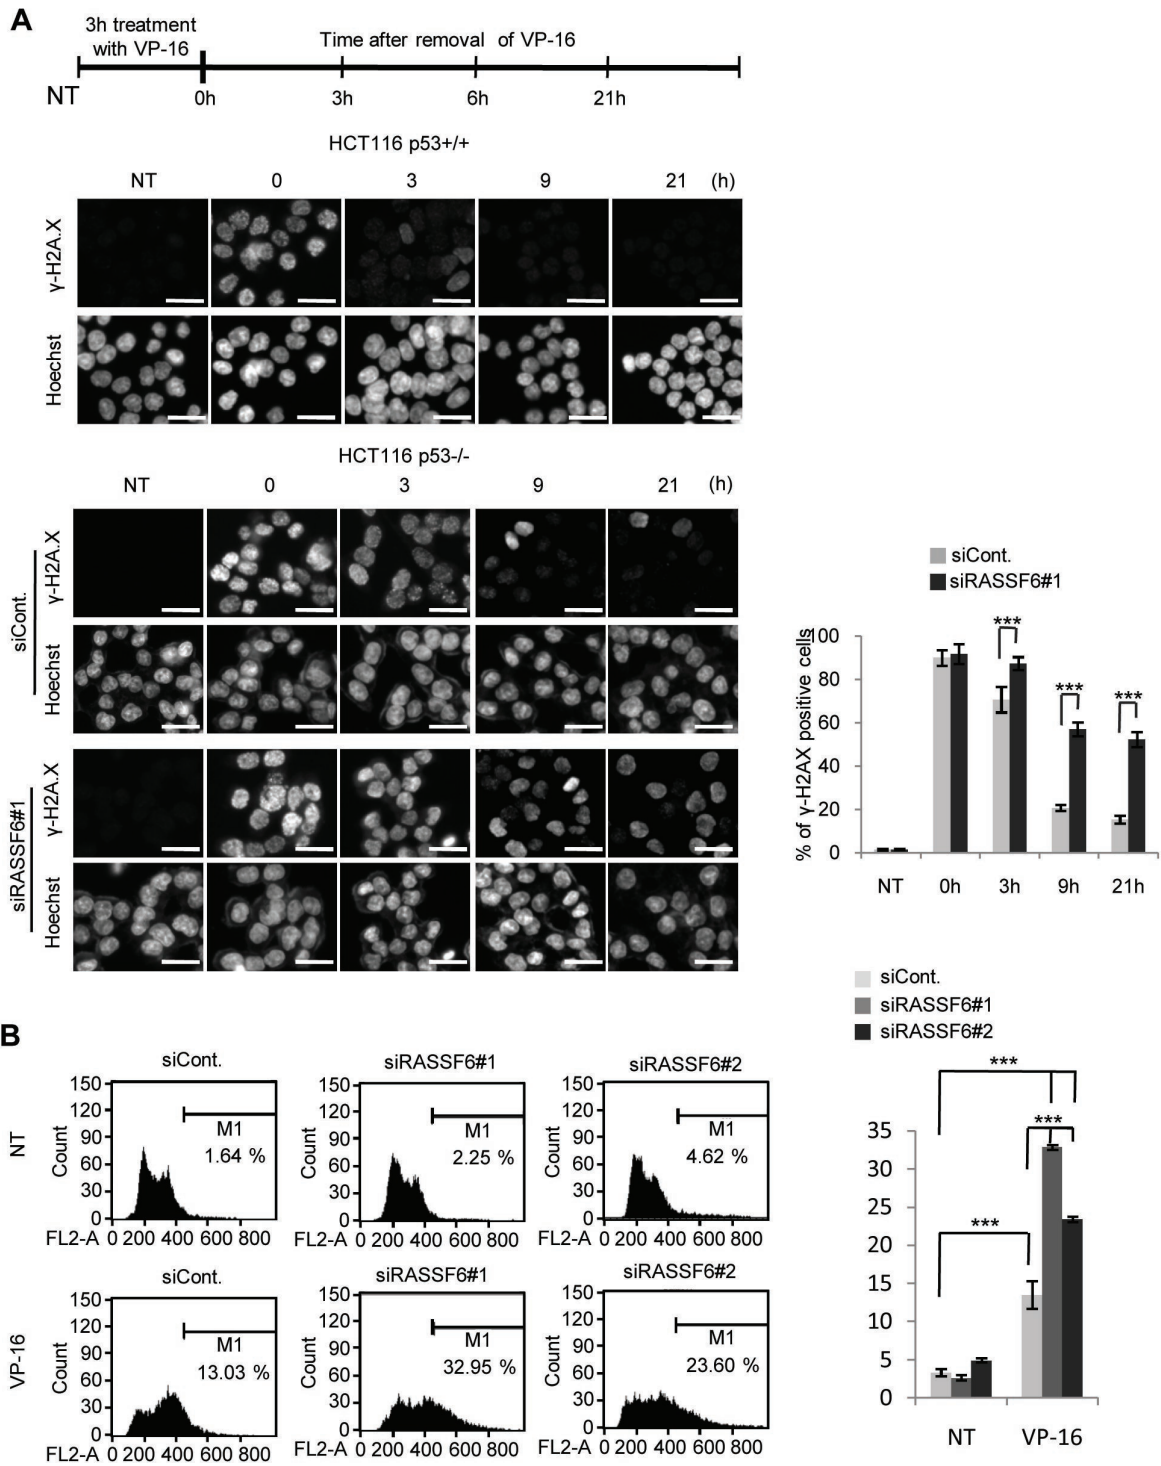

Figure 7: Hossain *et al.*

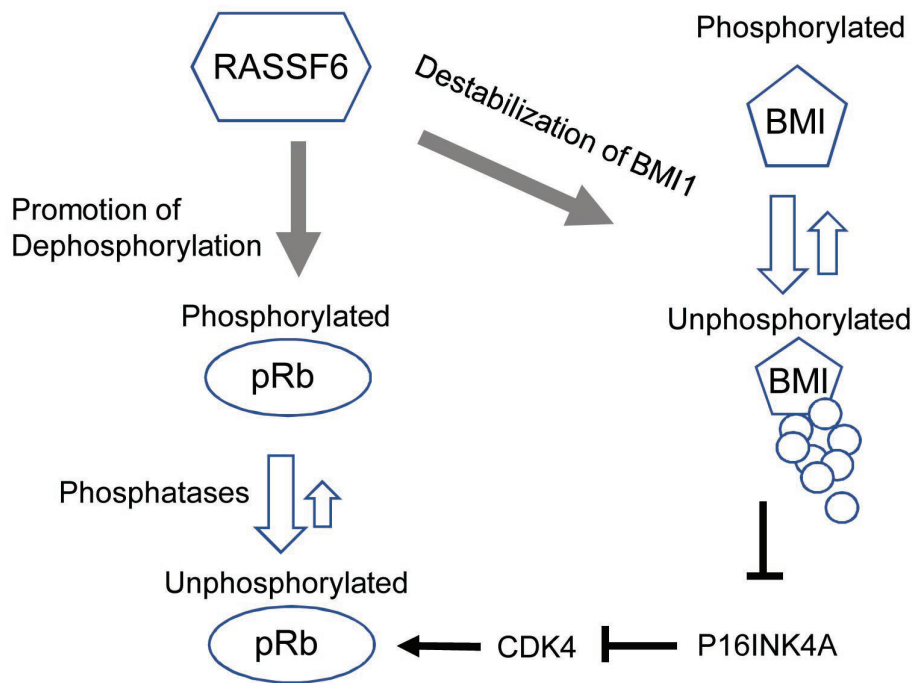

Figure 8: Hossain *et. al.*
